# Supplementary material
Source: PubMed Central journal article supplement (PMC7334437)
Supplement: NIHMS1602683-supplement-1.pdf [file NIHMS1602683-supplement-1.pdf]

**Supplemental Information: Wnt Activation and Reduced Cell-Cell Contact Synergistically Induce Massive Expansion of Functional Human iPSC-derived Cardiomyocytes**

|                               |                                  |
|-------------------------------|----------------------------------|
| <b>Supplementary Figure 1</b> | <b>Relates to Figure 1 and 2</b> |
| <b>Supplementary Figure 2</b> | <b>Relates to Figure 3</b>       |
| <b>Supplementary Figure 3</b> | <b>Relates to Figure 5</b>       |
| <b>Supplementary Figure 4</b> | <b>Relates to Figure 5</b>       |
| <b>Supplementary Figure 5</b> | <b>Relates to Figure 6</b>       |
| <b>Supplementary Table 1</b>  | <b>Relates to all figures</b>    |

## Supplemental Figure Legend

**Figure S1: Phenotypic analysis of hiPSC-CM proliferation upon GSK-3 $\beta$  inhibition. Related to Figure 1,2.** (A) Pluripotent, cardiac mesoderm, cardiac progenitor and cardiomyocyte transcription factor expression during hiPSC-CM differentiation. Dashed lines indicated gene expression in samples treated with 2.0  $\mu$ M CHIR99021 (CHIR) or DMSO (CTR) from day 12 to 14. Immunofluorescence images and graphs displaying (B) Islet-1 (ISL1) (red) or (C) Caspase 3 (red) and cardiac troponin T (TnT) positive cells at day 14 as in A. (D) Graph displaying the fold increase in cell numbers of freshly differentiated or cryopreserved hiPSC-CMs sparsely cultured with CHIR for multiple passages (P). (E) Expression of ki67, a cell-cycle index, in TnT+ cells after treatment with CHIR or DMSO (CTR). (F) hiPSC-CMs after treatment with DMSO (CTR) or CHIR. CMs were identified by staining for ACTN2 (white) and cycling CMs based on Anillin-eGFP (turquoise) expression. Anillin-eGFP localizations indicative for cell division, such as midbodies (arrow) and contractile rings (white box) were preferentially visible in CHIR treated CMs. Inset is a close-up of the boxed CM with an anillin-eGFP+ midbody (green). Nuclei are stained by DAPI (blue). Bars: 10  $\mu$ m, inset: 5  $\mu$ m. (G) Quantification of hiPS-derived eGFP-anillin+ CMs treated with either vehicle (CTR) or CHIR. CHIR treatment significantly increased the number of eGFP-anillin+ CMs at day (D) 10. Averaged values are expressed as mean  $\pm$  SEM; n=1; \* = p<0.05. Quantification of (H) bi-nucleation and (I) Ki67 expression (i.e. cell cycle index) as a percentage of total cells. hiPSC-CMs were cultured for 9 days with DMSO (CTR), CHIR or 6 days with CHIR followed by 3 days of Wnt inhibitor C59 (4.0  $\mu$ M). Data shown represent mean  $\pm$  SD, unless indicated else. \*p<0.05. Supplementary Table 1 specifies the replicates per experiment.

**Figure S2: Single-cell gene expression analysis of hiPSC-CMs following CHIR or C59 treatment. Related to Figure 3.** (A) Quality control (QC) graphs featuring RNA content of all captured cells that have been treated with DMSO (1:2500) (CTR- gray), CHIR (4.0  $\mu$ M) (CHIR-yellow), or C59 (4.0  $\mu$ M) (C59-black) for 24 hours starting at day 12. (B) Post QC gating and unsupervised clustering of cells. (C) Heat map of genes for identity assignment validation of 5 populations characterized as ventricular CMs in G1-phase (vCM (G1))(red), ventricular CMs in S/G2-M-phase (vCM (S/G2M))(yellow), atrial CMs in G1-phase (aCM (G1))(green), atrial CMs in S/G2-M-phase (aCM (S/G2M))(blue) and fibroblast (Fb)(pink). (D) UMAPS displaying the characterized cell populations for the indicated treatments. (E) Heat map displaying top 10 highest expressed genes in the vCM (S/G2M), vCM (G1), aCM (G1) and aCM (S/G2M) populations. UMAP plots for (F) cardiac progenitor genes and (G) cardiac transcription factors for the indicated treatments.

**Figure S3: Confirmation of Wnt signaling at the receptor level to induce immature hiPSC-CM proliferation and mature hiPSC-CM cell cycle activity. Related to Figure 5.** (A) Experimental diagram of immature day 12 (D12) hiPSC-CMs treated with various Wnt ligands and CHIR for 6 days. (B) Representative immunofluorescence images of immature hiPSC-CMs treated with R-Spondin 1 (RSPO) (25nM), Wnt3A (100 ng/mL), scFv-DKK1c (200 nM), scFv-DKK1c (200nM) + RSPO (25 nM), CHIR (2.0  $\mu$ M), or media alone (CTR). (C) Quantification of the TnT positive cell numbers after treatment with the indicated Wnt ligands and CHIR. (D) Immunohistochemistry for Ki67 and troponin T (TnT) for the indicated treatments. (E) Plots displaying the percentages of Ki67+ /TnT+ cells. (F) Immunohistochemistry for mitosis marker pHH3 in hiPSC-CMs treated with various Wnt activators. (G) Plots displaying the percentages of pHH3+/TnT+ cells. Scale bars represent 100 $\mu$ m. Dot plots represent biological replicates and mean. \*\*p<0.005 by unpaired t-test. Supplementary Table 1 specifies the replicates per experiment.

**Figure S4: Kinase expression in hiPSC-CM treated with CHIR. Related to Figure 5.** (A) Graph displaying the expression of 43 kinases in hiPSC-CMs at day 12 after 0 (T0), 10 (T10) and 100 minutes of stimulation with 4.0  $\mu$ M of CHIR99021 (CHIR). (B) Multiple immunofluorescence images of pAKT T308 and TnT in hiPSC-CMs treated with CHIR for 3 passages.

**Figure S5: Treatment of mice with CHIR results in increased myocardial cell-division in the late embryonic but not the postnatal heart. Related to Figure 6.** (A) Representative immunofluorescence for Troponin T (TnT), phospho Histone H3 (pHH3) and 4',6-diamidino-2-phenylindole (DAPI) of whole hearts and myocardial sections with magnified views from day 20.5 (E20.5) embryo's that were treated at

E16.5 for 4 consecutive days with a once-daily injection of 50mg/kg CHIR99021 (CHIR) (N = 3) or DMSO carrier control (CTR) (N = 3). **(B)** Relative number of mitotic cardiomyocytes (pHH3+/TnT+) in the myocardium of E20.5 embryo's treated with CHIR or CTR. **(C)** Percentages of mitotic cells in the heart of E20.5 embryo's treated with CHIR or CTR. **(D)** Representative immunofluorescence images of heart sections from embryo's treated with CHIR or CTR for wheat germ agglutinin (WGA) and DAPI. **(E)** Quantification of the relative pixels/area indicating cell size for both groups. **(F)** Immunofluorescence in postnatal day 10 (P10) animals treated for 6 days with a once-daily injection of CHIR 50mg/kg or CTR. **(G)** percentages of mitotic cells (pHH3+) in the myocardium of P10 animals treated with CHIR or CTR. Scale bars represent 50µm. Dot plots represent biological replicates and mean. Data shown in bar graph represents mean±SD. \*\*p<0.005 by unpaired t-test. Supplementary Table 1 specifies the replicates per experiment.

**Supplementary Table 1: Data Transparency. Related to all figures.**

| Figure | Subpanel | Cell Line                          | Biological Replicate | Technical Replicate                       | Total Number of Cells Analyzed                              |
|--------|----------|------------------------------------|----------------------|-------------------------------------------|-------------------------------------------------------------|
| 1      | B        | CVI-111                            | 4-8                  | 2                                         | N/A                                                         |
| 1      | D        | CVI-111                            | 6                    | 3 (for dense (w/o PSG), 30 (for sparse) * | w/o PSG (6601), Dense (6056), Sparse (8573).                |
| 1      | F        | CVI-111                            | 6                    | 3 (for dense (w/o PSG), 30 (for sparse) * | w/o PSG (7688), Dense (6817), Sparse (6115).                |
| 1      | I        | CVI-111                            | 4                    | 2                                         | Fresh (234), 1X C/M (231), 0.1X C/M (229), 0.01X C/M (260). |
| 1      | L        | CVI-111                            | 3                    | 4-5 (for dense), 15-17 (for sparse) *     | Dense (3058), Sparse (1109).                                |
| 1      | N        | CVI-111                            | 6                    | 3-4 (for dense), 9-10 (for sparse) *      | Dense (7327), Sparse (3071).                                |
| 2      | C        | CVI-111, CVI-113, CVI-202, CVI-273 | 4                    | 2                                         | n/a                                                         |
| 2      | E        | CVI-111, CVI-113, CVI-202, CVI-273 | 4                    | 2                                         | n/a                                                         |
| 2      | F        | CVI-111, CVI-113, CVI-202, CVI-273 | 4                    | 2                                         | n/a                                                         |
| 2      | H        | CVI-111, CVI-113, CVI-202, CVI-273 | 4                    | 2                                         | n/a                                                         |
| 2      | I-J      | CVI-111, CVI-202, CVI-273          | 3                    | 2                                         | 600000                                                      |
| 2      | L        | CVI-111                            | 2                    | 2                                         | 175                                                         |
| 3      | D-E      | CVI-111                            | 20                   | 1                                         | 60                                                          |
| 3      | G-H      | CVI-111                            | 12                   | 1                                         | n/a                                                         |
| 3      | I-K      | CVI-111                            | 3                    | 2                                         | n/a                                                         |

|    |         |                  |       |                                        |                                                                                                         |
|----|---------|------------------|-------|----------------------------------------|---------------------------------------------------------------------------------------------------------|
| 3  | L-P     | CVI-273          | 1     | 1                                      | 8381                                                                                                    |
| 4  | B       | CVI-111          | 7     | 5 (for dense),<br>10-14 (for sparse) * | Dense (4814),<br>Sparse (1812).                                                                         |
| 4  | E       | CVI-111          | 3     | 10                                     | 1 kPa (1416),<br>10 kPa (1778),<br>60 kPa (893),<br>TCP (3397).                                         |
| 4  | G       | CVI-111          | 3     | 3                                      | 1 kPa (204),<br>10 kPa (166),<br>60 kPa (324),<br>TCP (348).                                            |
| 4  | I       | CVI-111          | 3-4   | 3                                      | Dense/DMSO(1681),<br>Sparse/DMSO(708),<br>Sparse/0.1uM(426),<br>Sparse/1uM(858),<br>Sparse/10uM(593).   |
| 4  | K       | CVI-111          | 6     | 3                                      | Dense/DMSO(1793),<br>Sparse/DMSO(657),<br>Sparse/0.1uM(861),<br>Sparse/1uM(1165),<br>Sparse/10uM(1020). |
| 5  | A       | CVI-111          | 6     | 1                                      | n/a                                                                                                     |
| 5  | B       | CVI-111          | 4     | 2                                      | 996                                                                                                     |
| 5  | C       | CVI-111          | 2     | 2                                      | n/a                                                                                                     |
| 5  | D       | CVI-111          | 1     | 2                                      | n/a                                                                                                     |
| 5  | F       | CVI-111, CVI-273 | 2     | 1                                      | n/a                                                                                                     |
| 5  | H-I     | CVI-111          | 4     | 2                                      | 1144                                                                                                    |
| 5  | J       | CVI-111          | 4     | 2                                      | n/a                                                                                                     |
| 5  | K       | CVI-111          | 2     | 2                                      | n/a                                                                                                     |
| 5  | N       | CVI-111          | 4     | 2                                      | 955                                                                                                     |
| 5  | P       | CVI-111          | 4     | 2                                      | 1368                                                                                                    |
| 6  | B       | CVI-111          | 3     | 2                                      | n/a                                                                                                     |
| 6  | F-G     | CVI-111, CVI-273 | 12-20 | 1                                      | n/a                                                                                                     |
| S1 | A       | CVI-111          | 3     | 2                                      | n/a                                                                                                     |
| S1 | B       | CVI-111          | 2     | 2                                      | 263                                                                                                     |
| S1 | C       | CVI-111          | 2     | 2                                      | 438                                                                                                     |
| S1 | D       | CVI-111          | 2     | 2                                      | n/a                                                                                                     |
| S1 | H-I     | CVI-111          | 2     | 2                                      | 274                                                                                                     |
| S2 | A-G     | CVI-273          | 1     | 1                                      | 8381                                                                                                    |
| S3 | C, E, G | CVI-111          | 4     | 2                                      | 5098                                                                                                    |
| S4 | A-B     | CVI-111          | 1     | 2                                      | n/a                                                                                                     |
| S5 | B-C     | Mice             | 4     | 2                                      | 112162                                                                                                  |
| S5 | E       | Mice             | 3     | 2                                      | 600                                                                                                     |
| S5 | G       | Mice             | 3     | 4                                      | 157280                                                                                                  |

\* to analyze the comparable number of single cells,  
w/o = without, PSG = Passaging, n/a = not applicable
