# Supplementary material
Source: PubMed Central journal article supplement (PMC7334437)

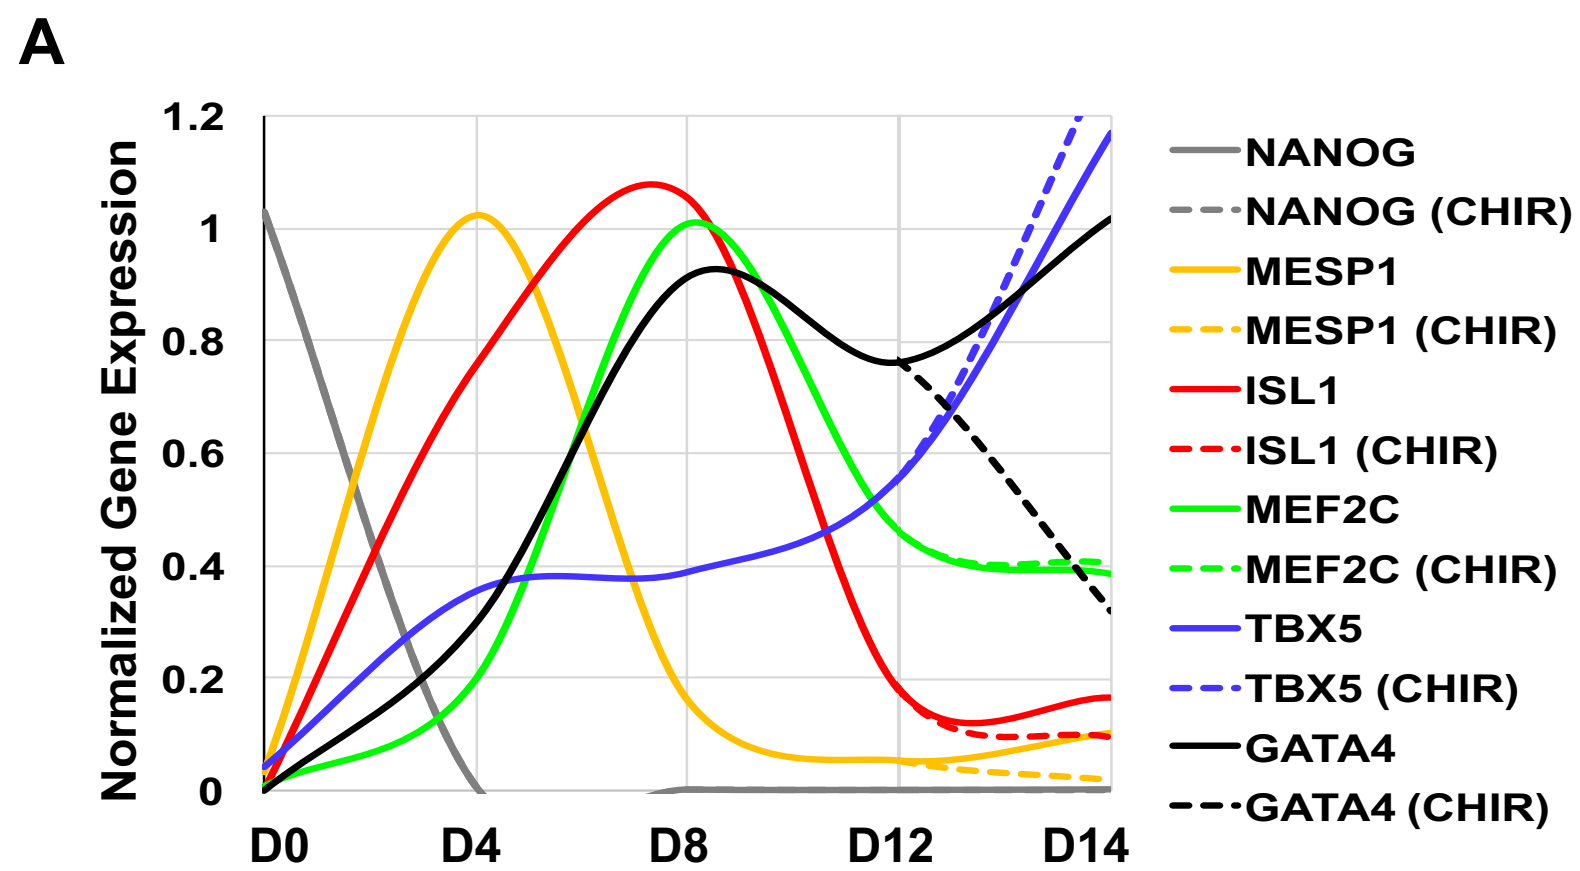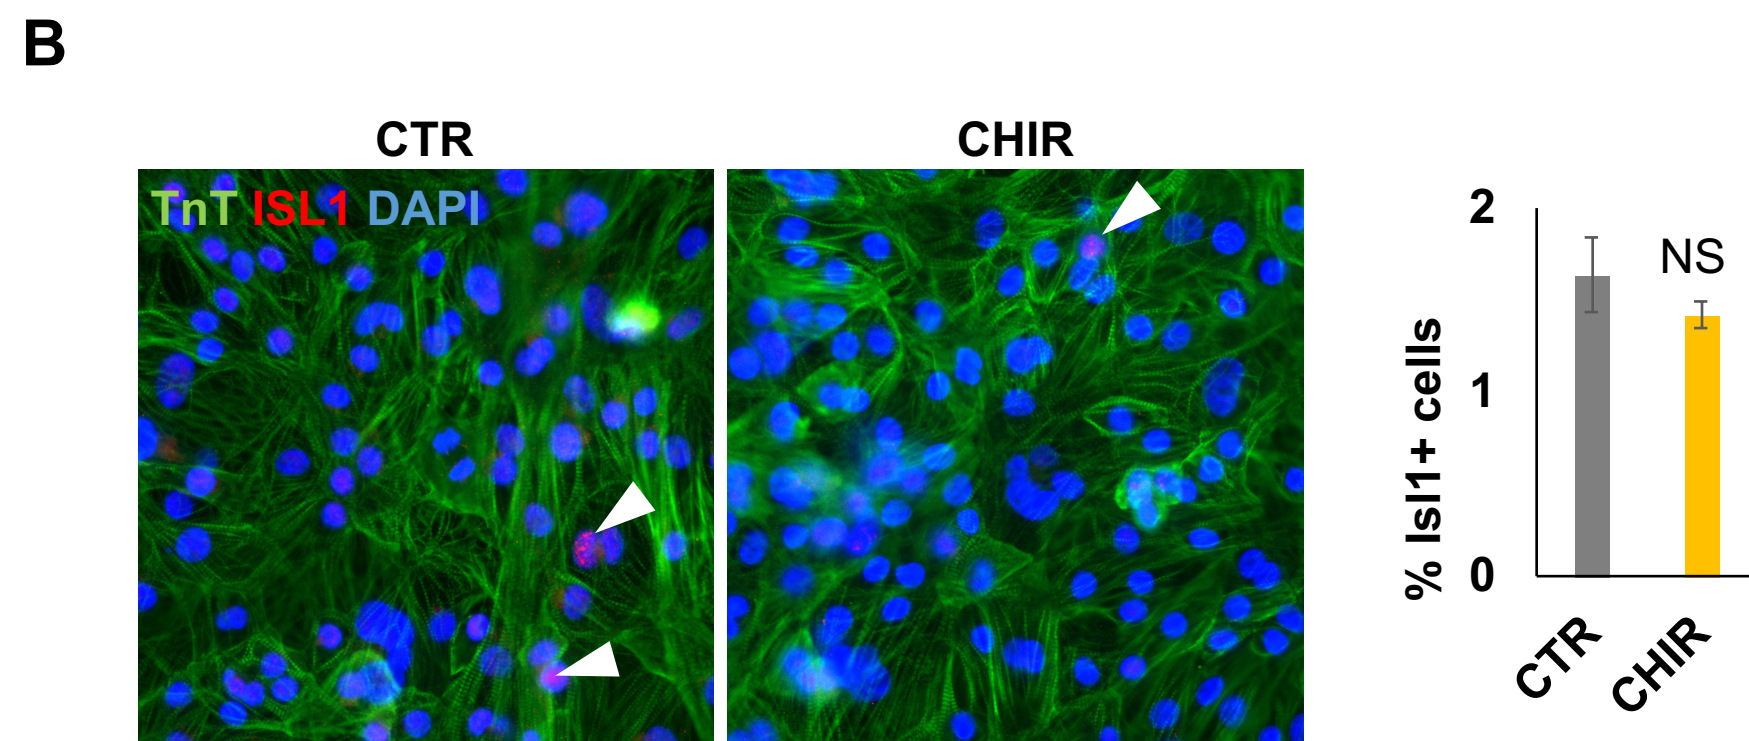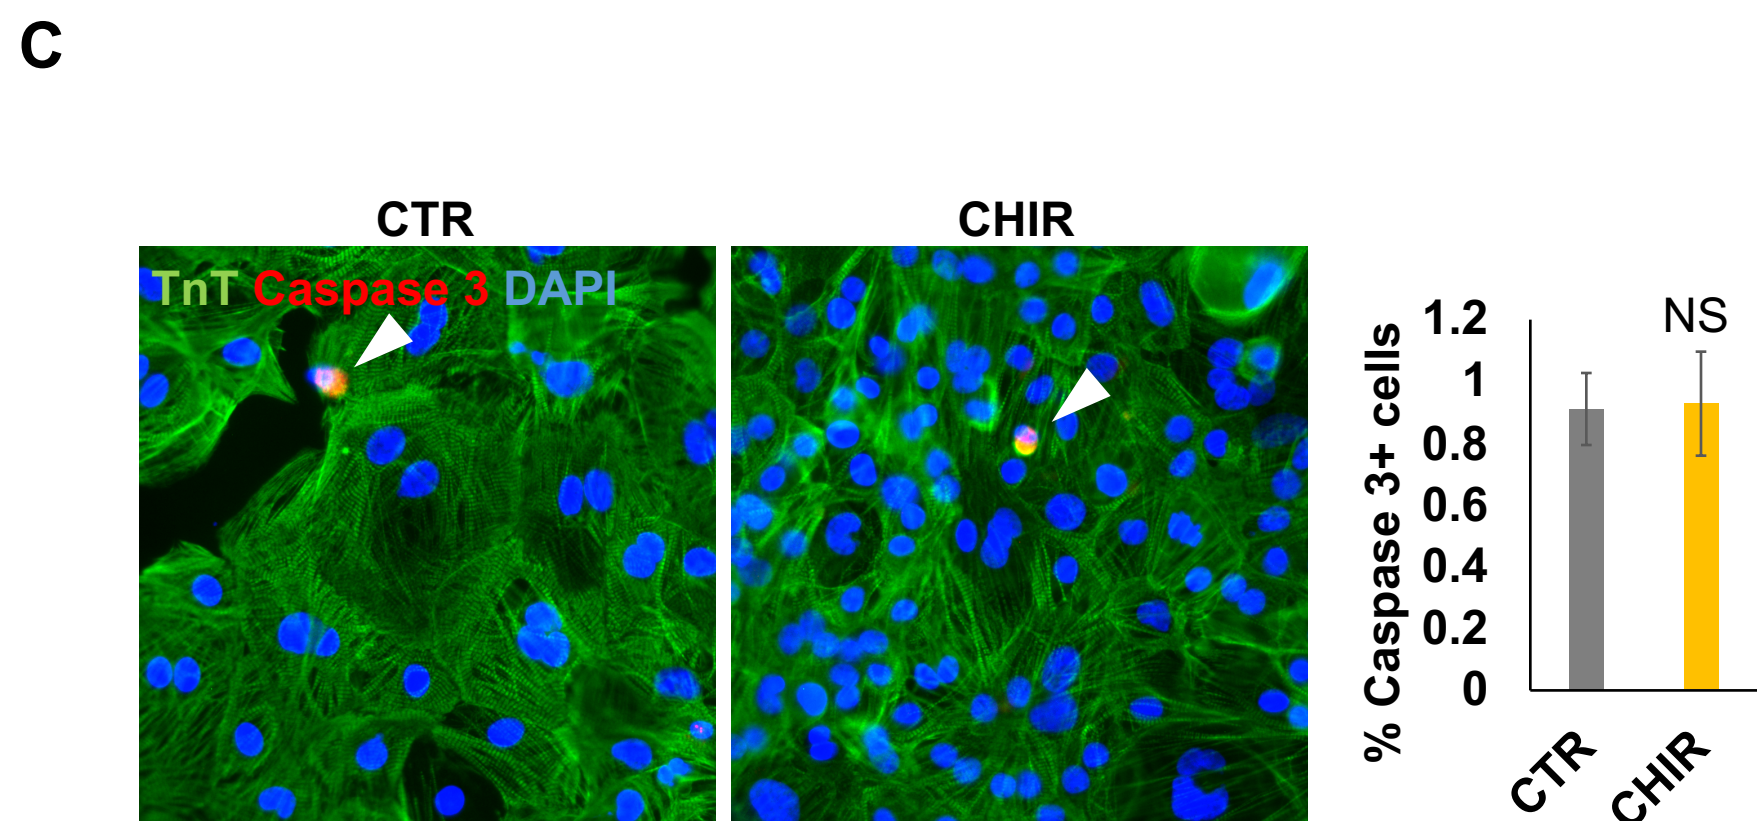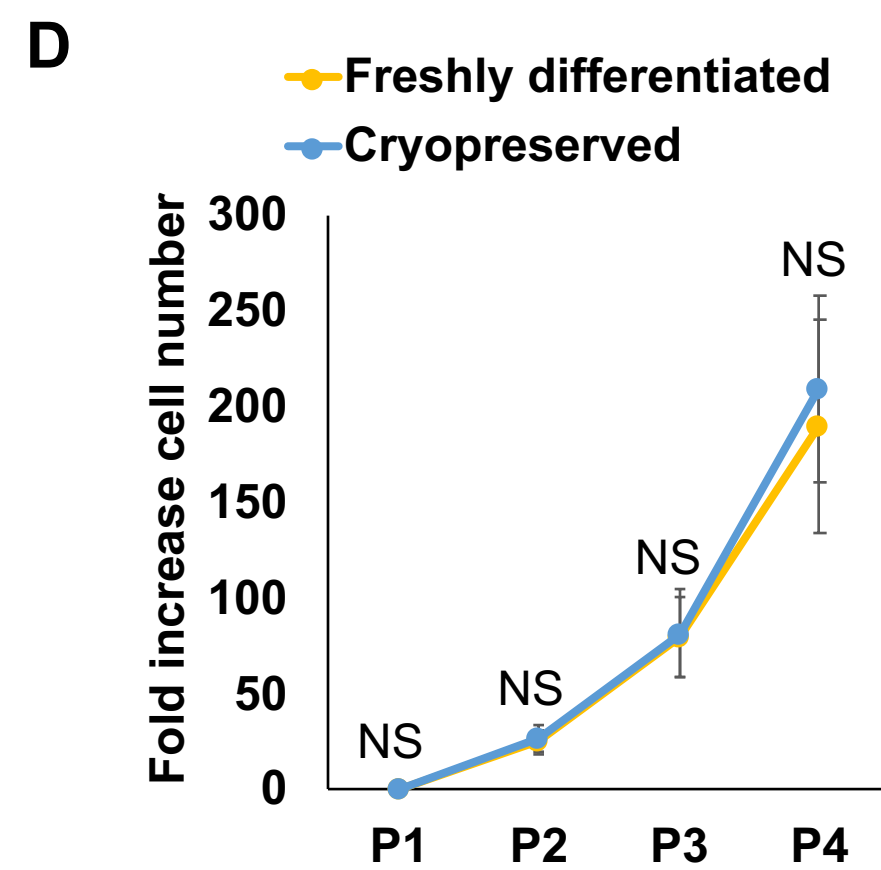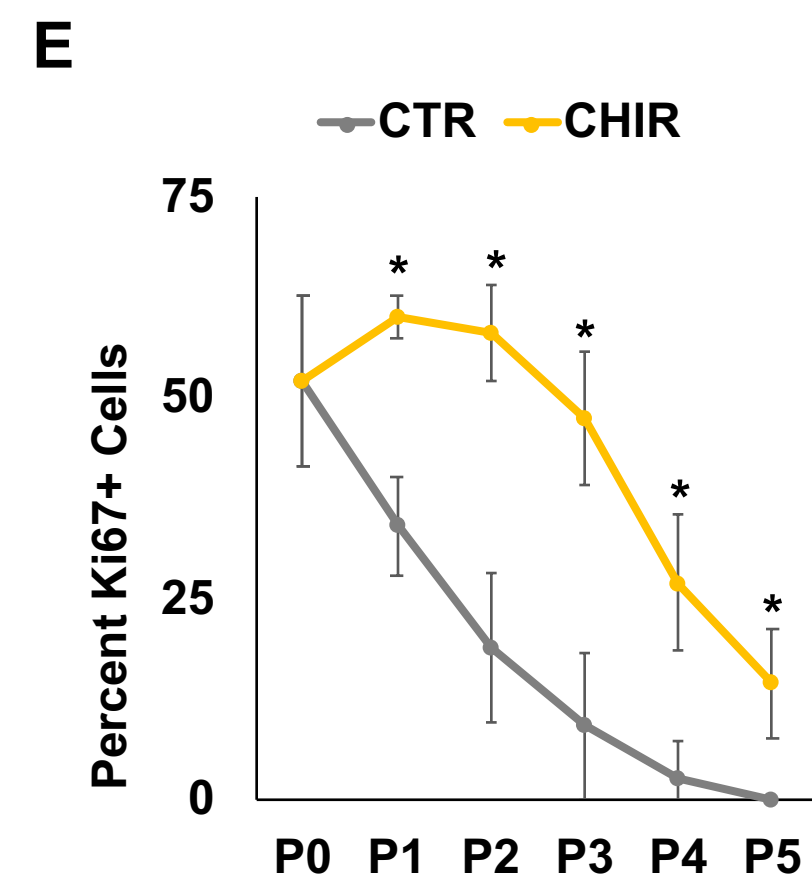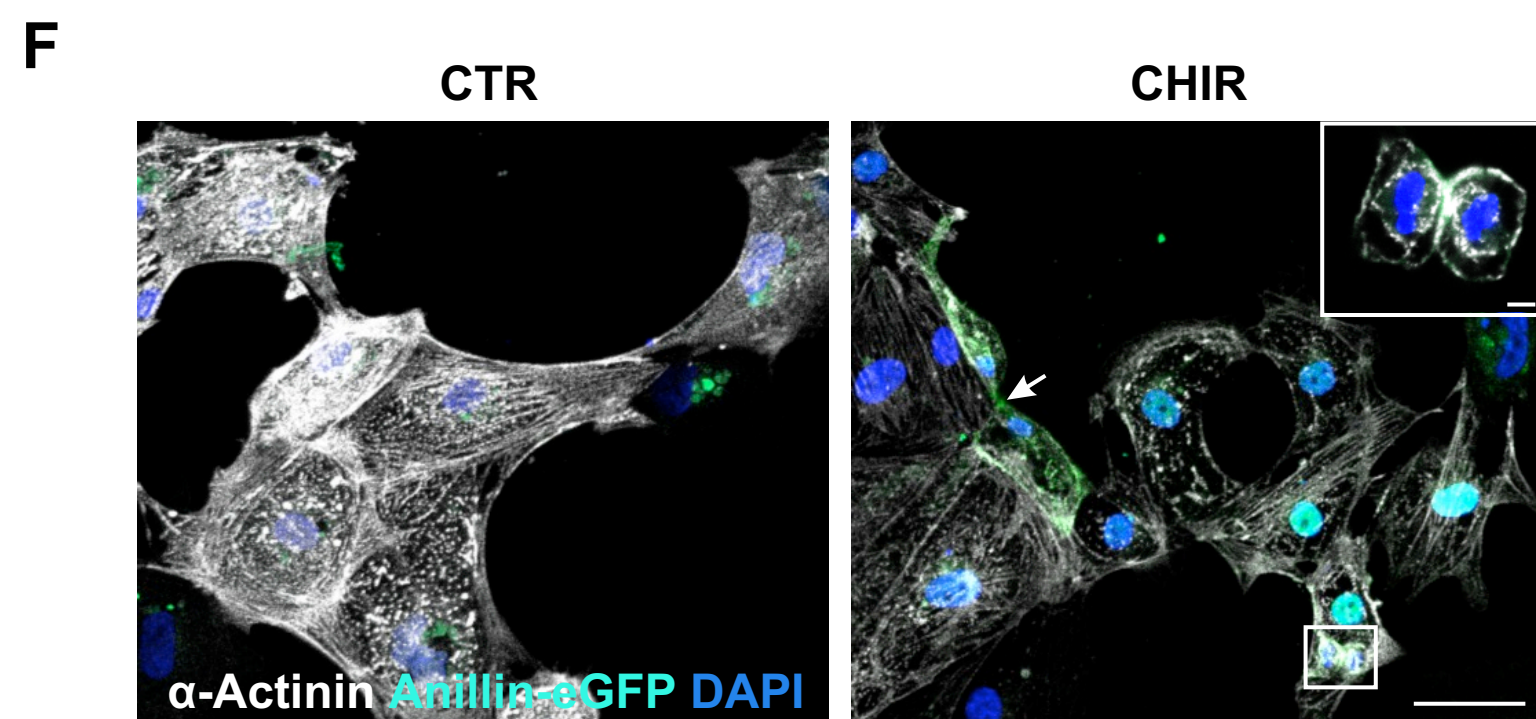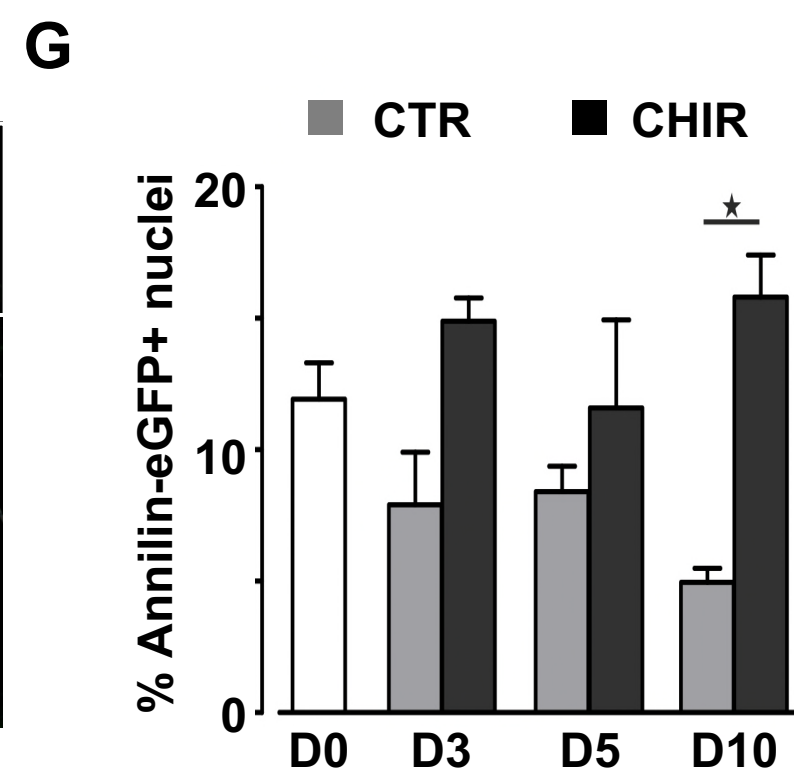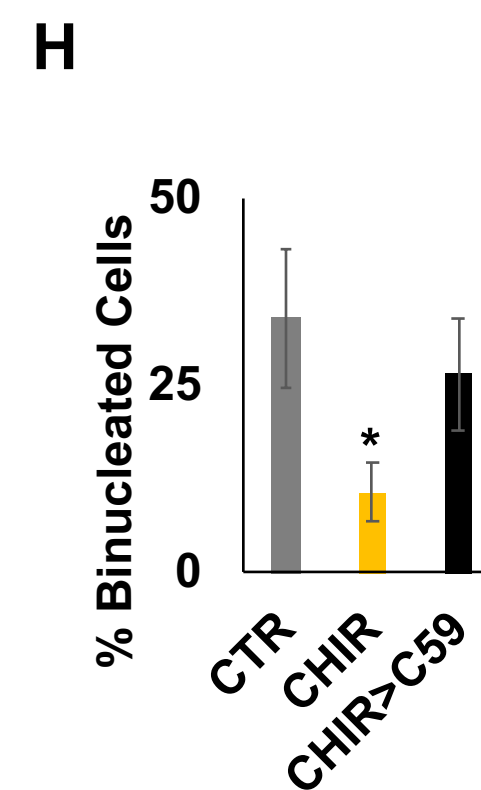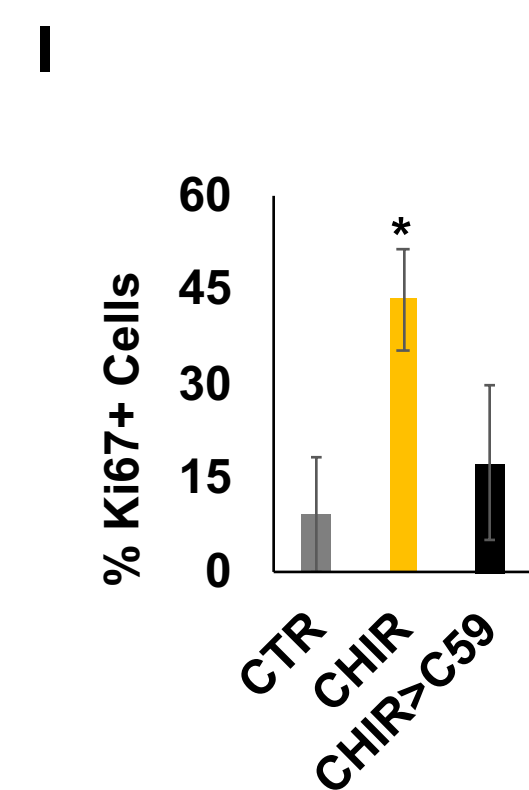

Supplement: NIHMS1602683-supplement-2.pdf [file NIHMS1602683-supplement-2.pdf]

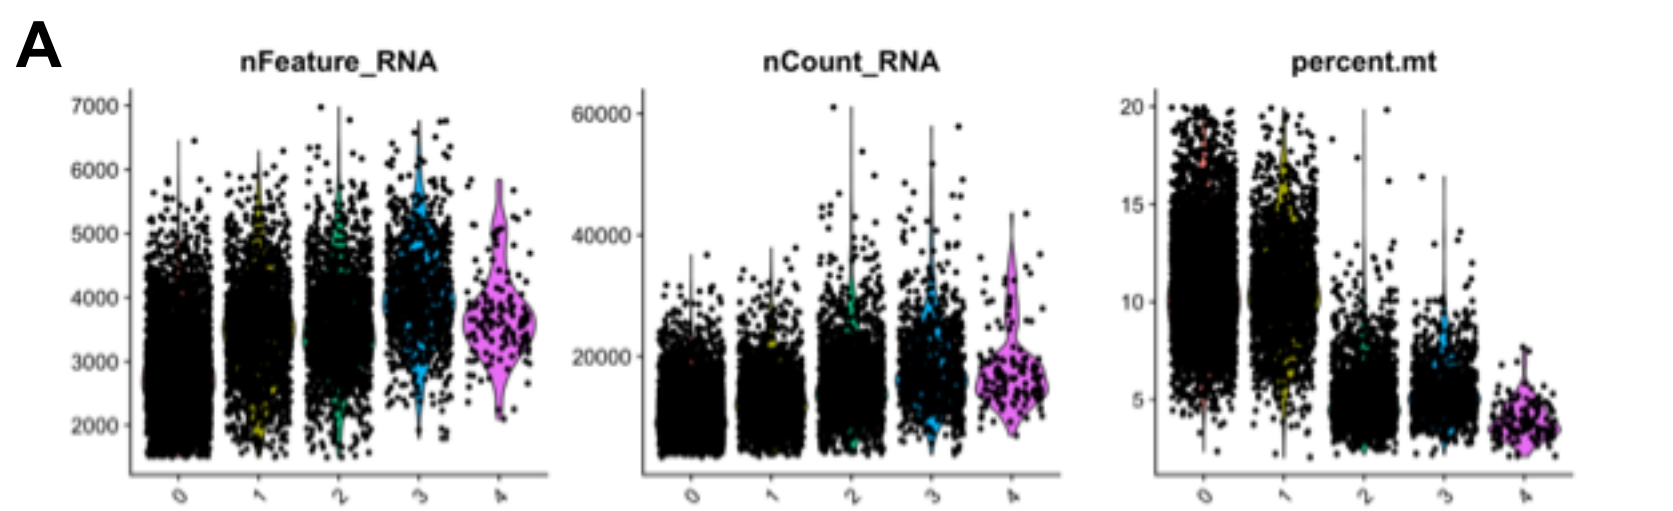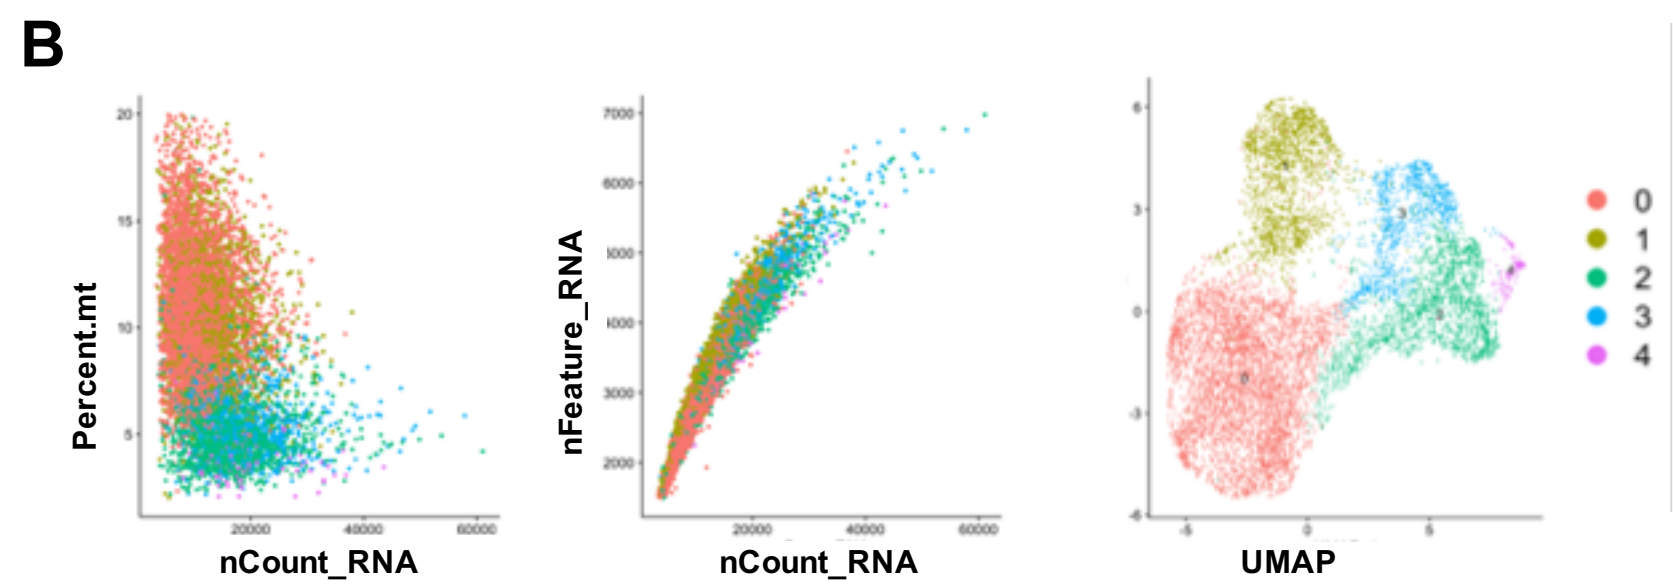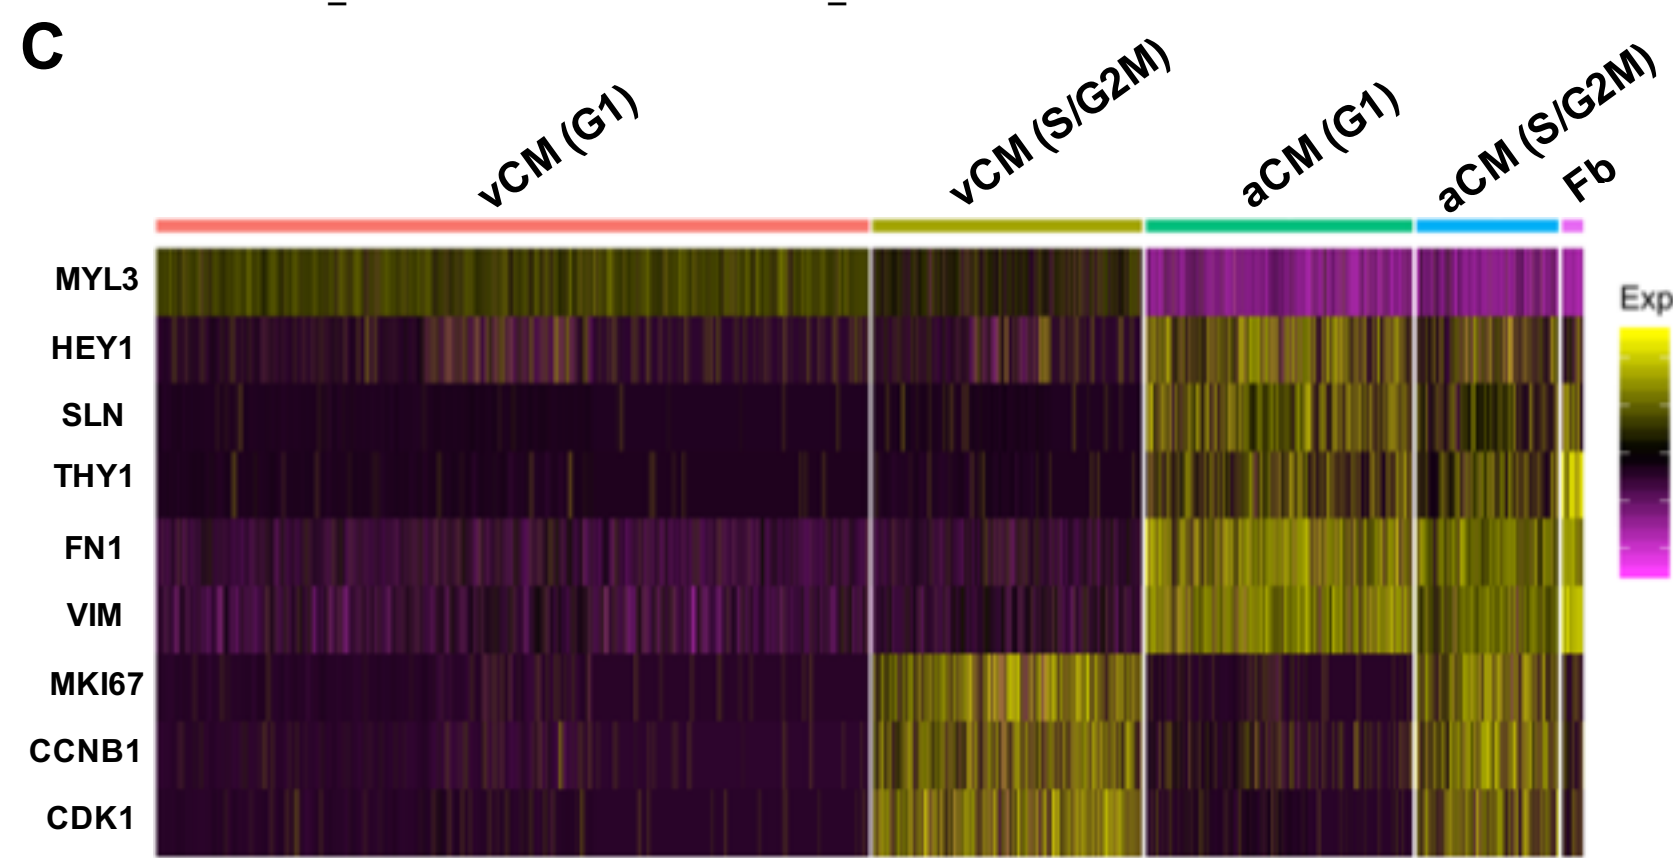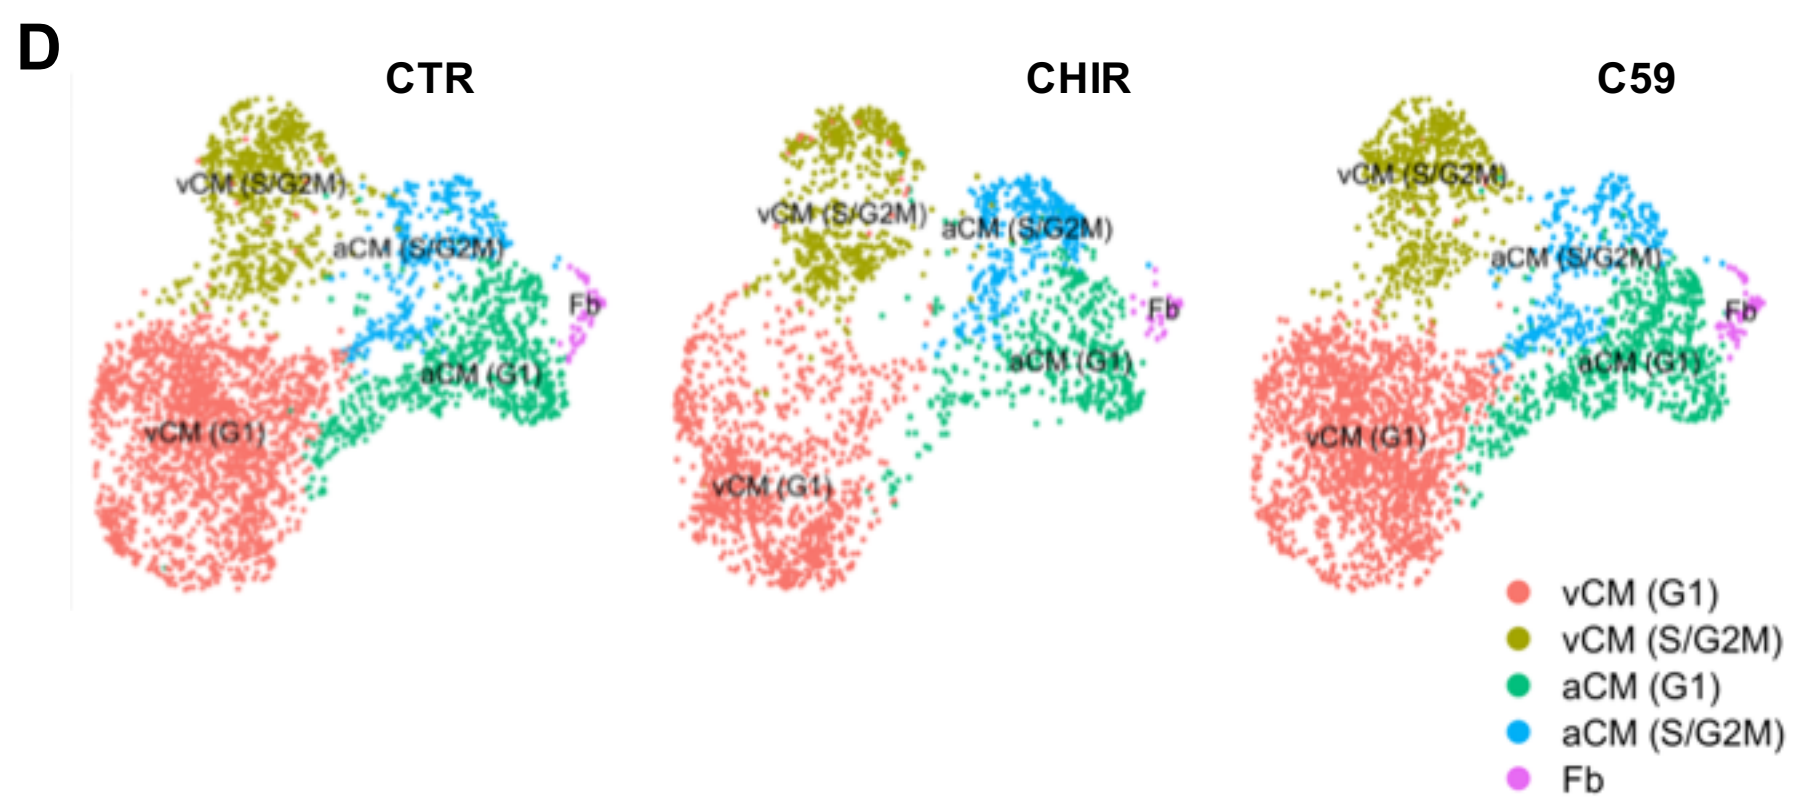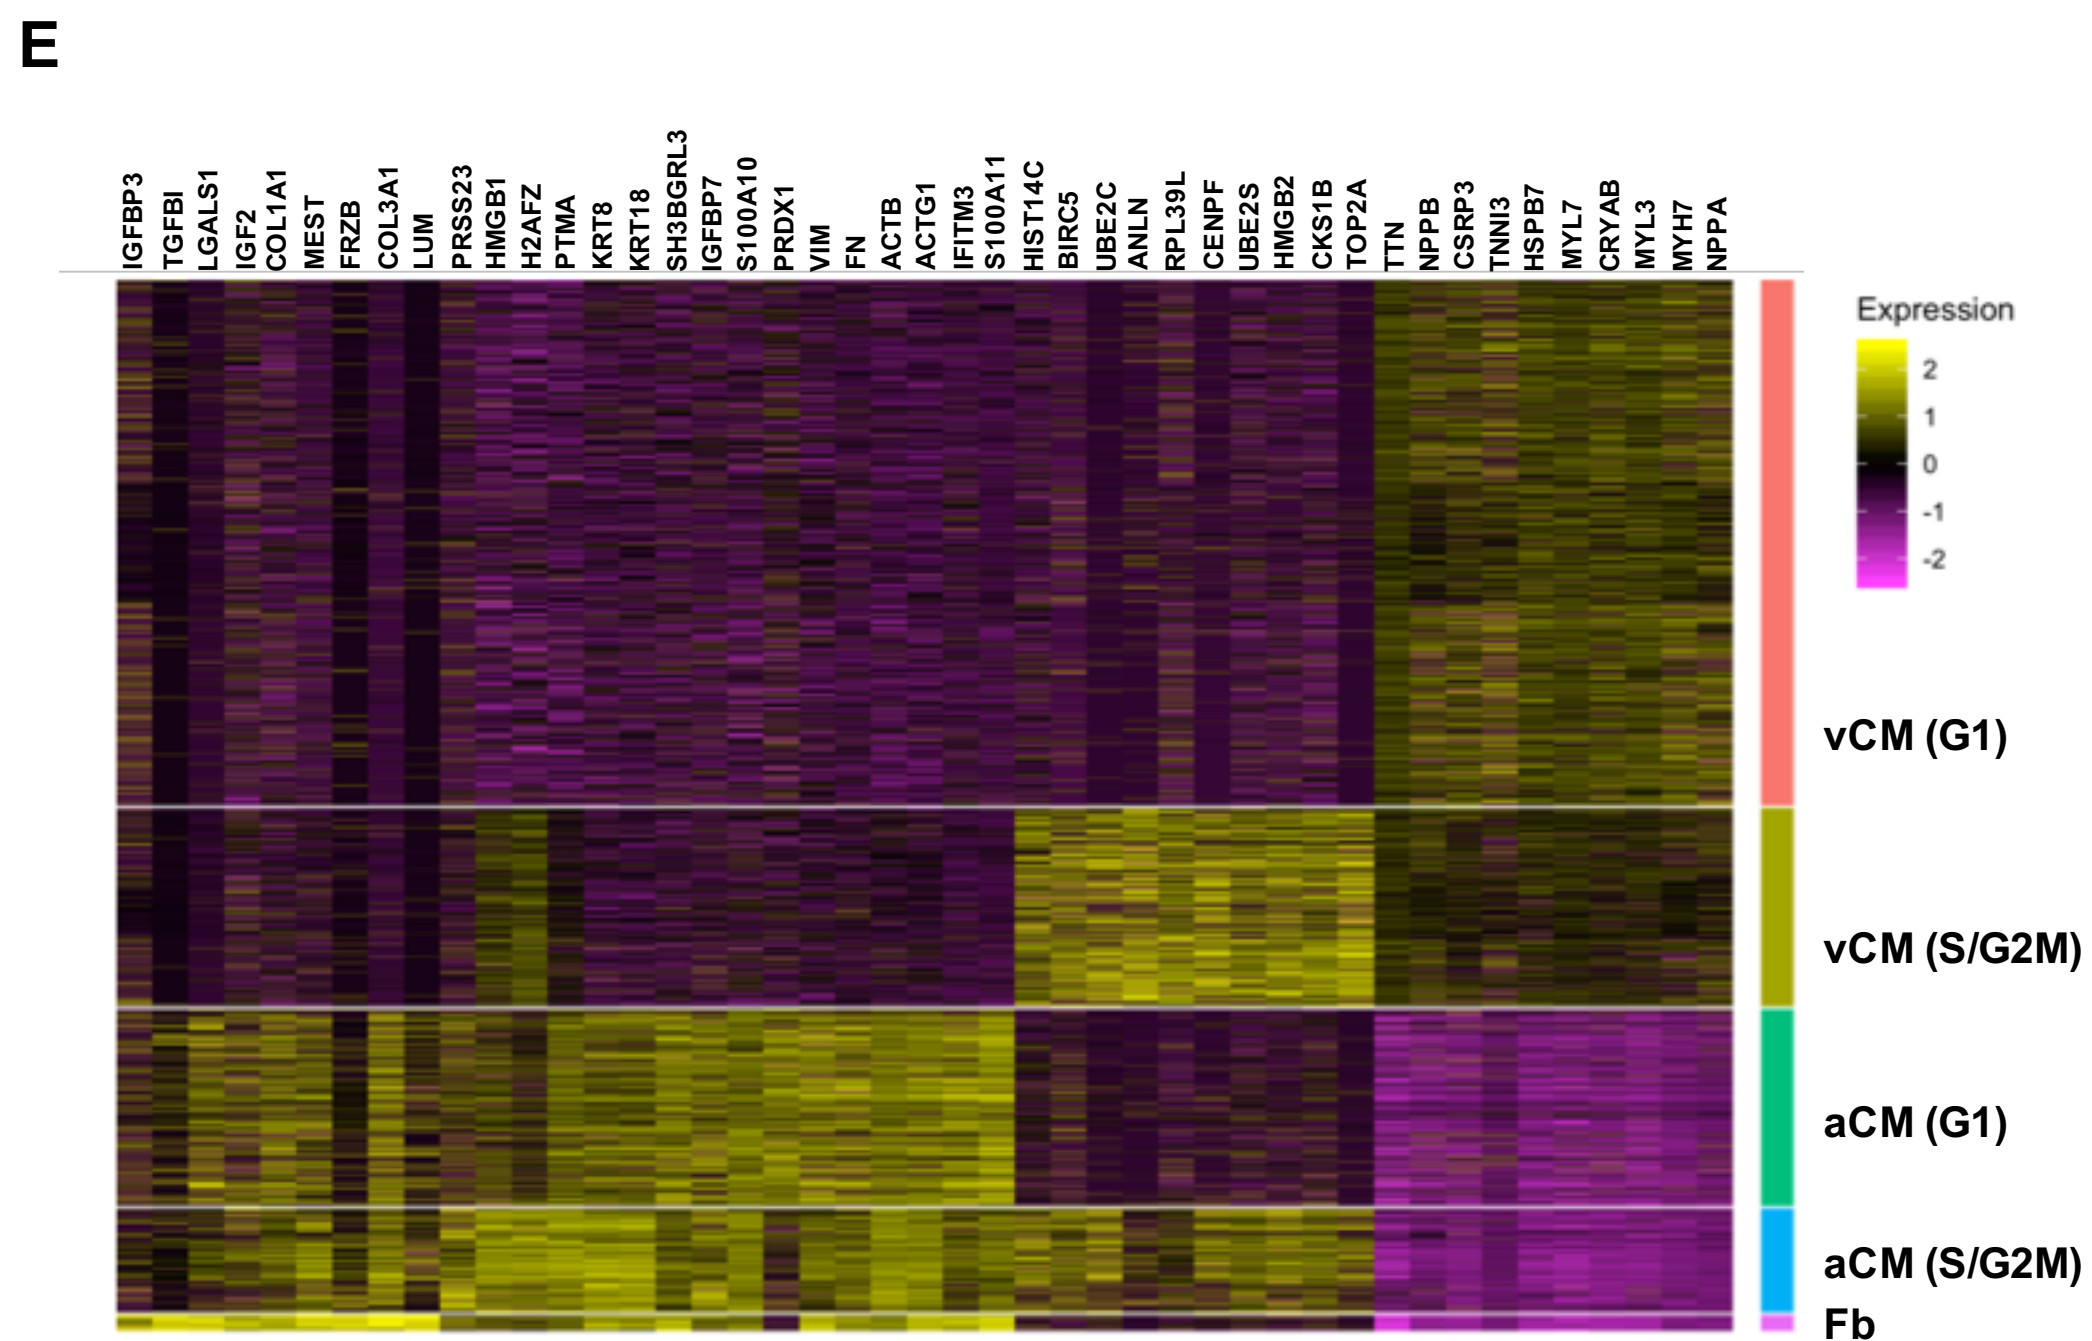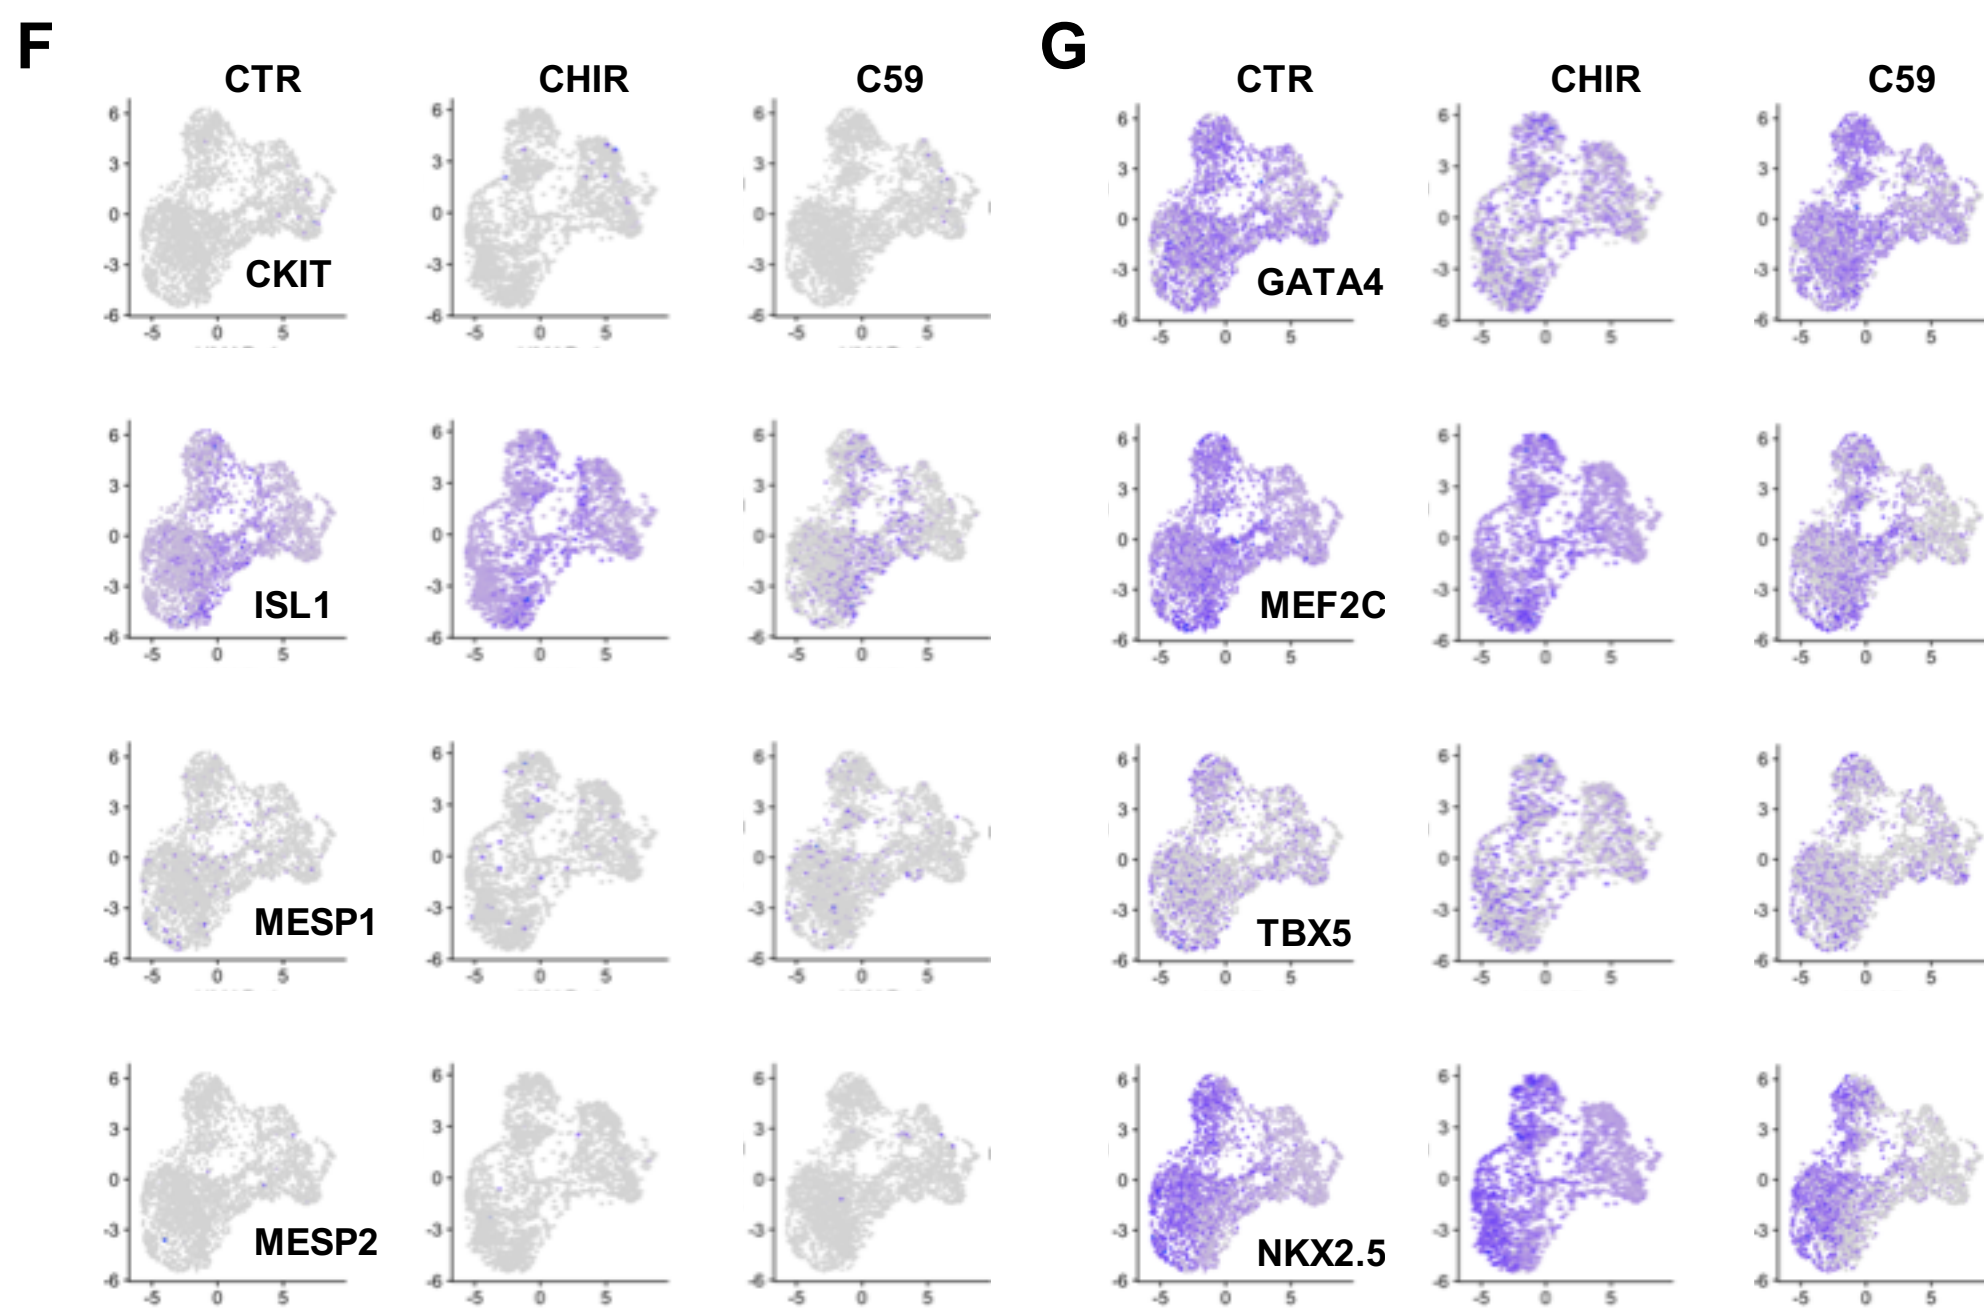

Supplement: NIHMS1602683-supplement-3.pdf [file NIHMS1602683-supplement-3.pdf]

**A**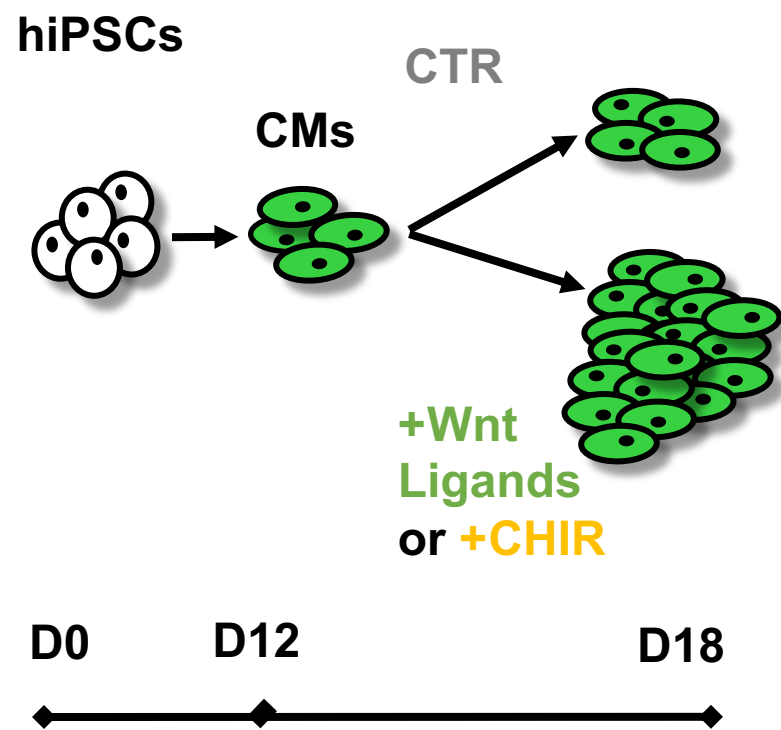**B**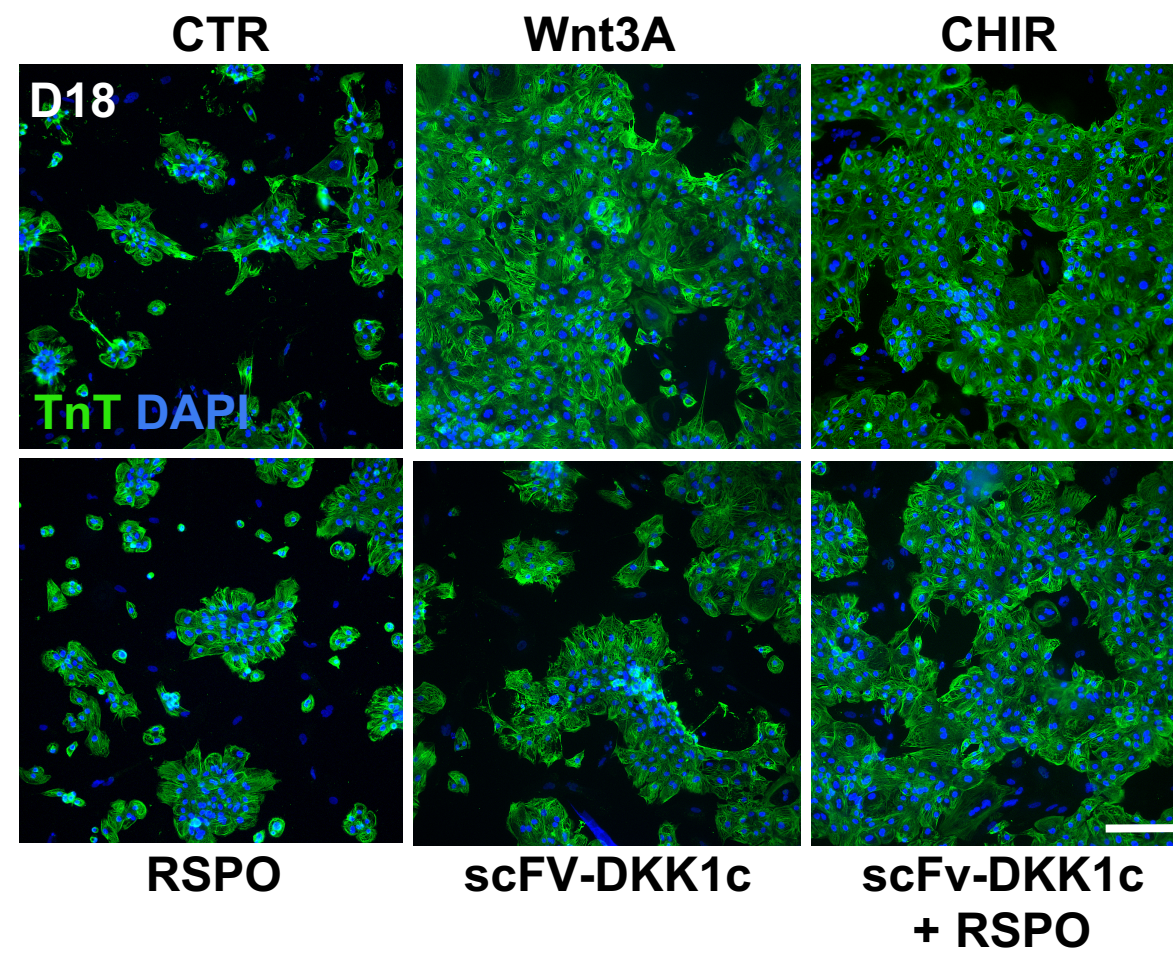**C**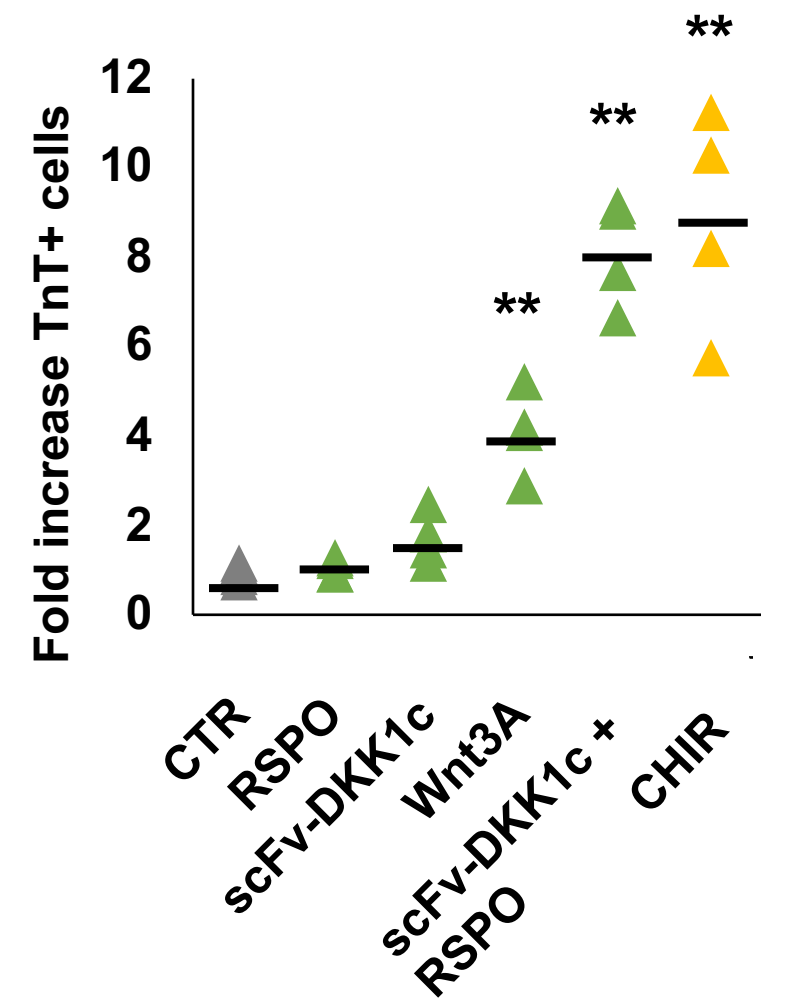**D**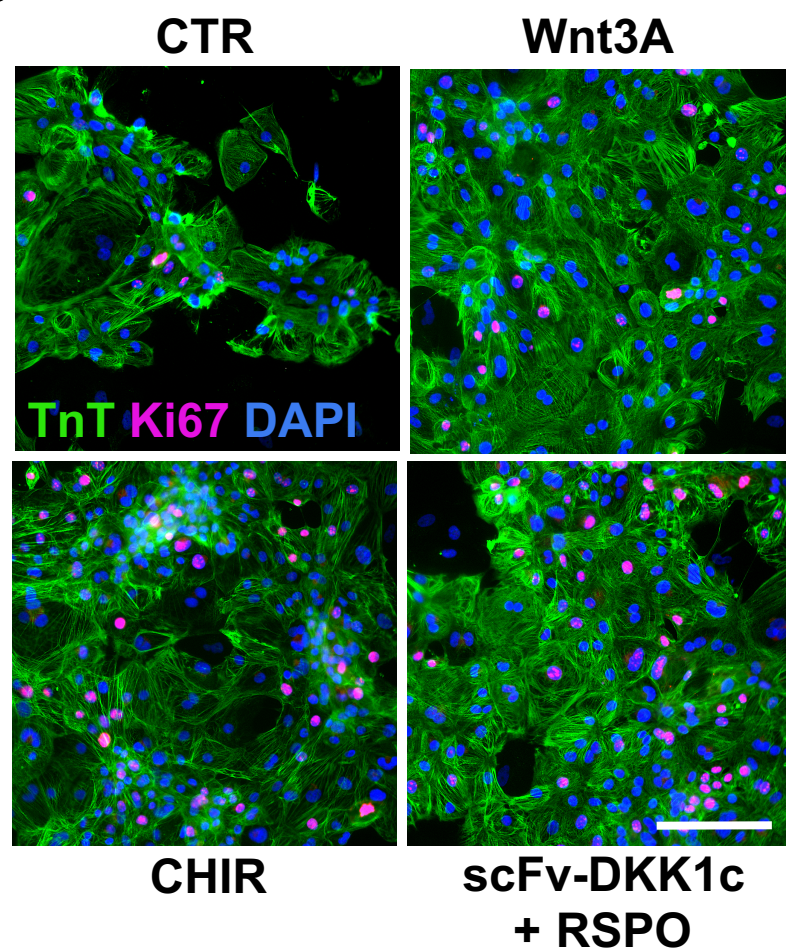**E**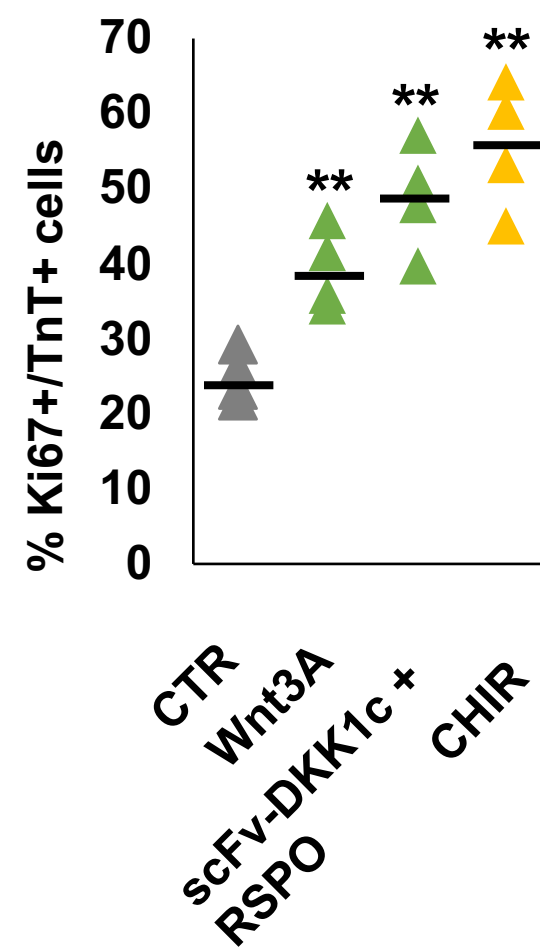**F**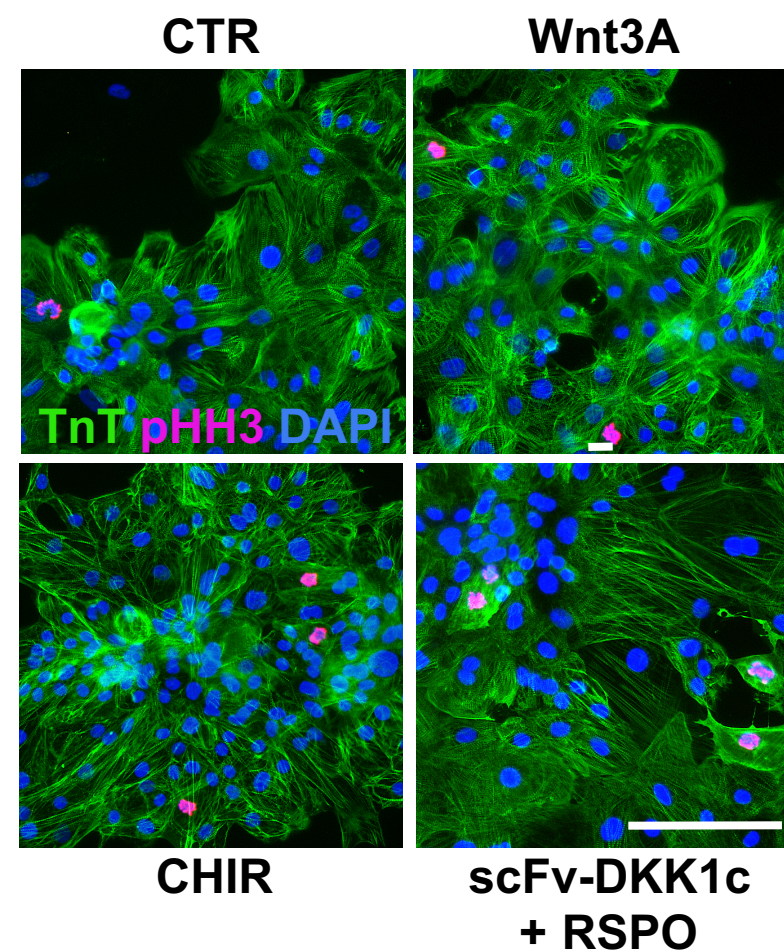**G**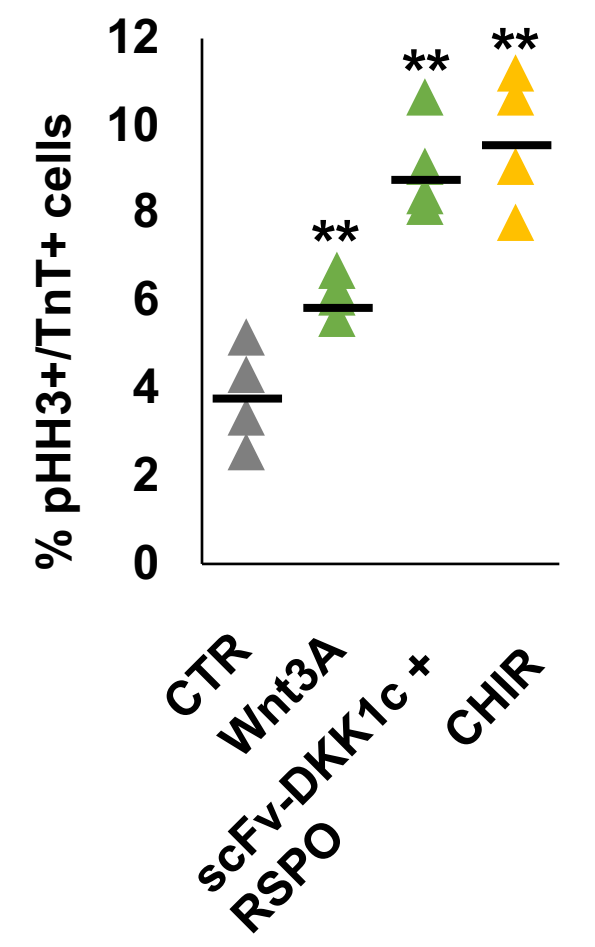

Supplement: NIHMS1602683-supplement-4.pdf [file NIHMS1602683-supplement-4.pdf]

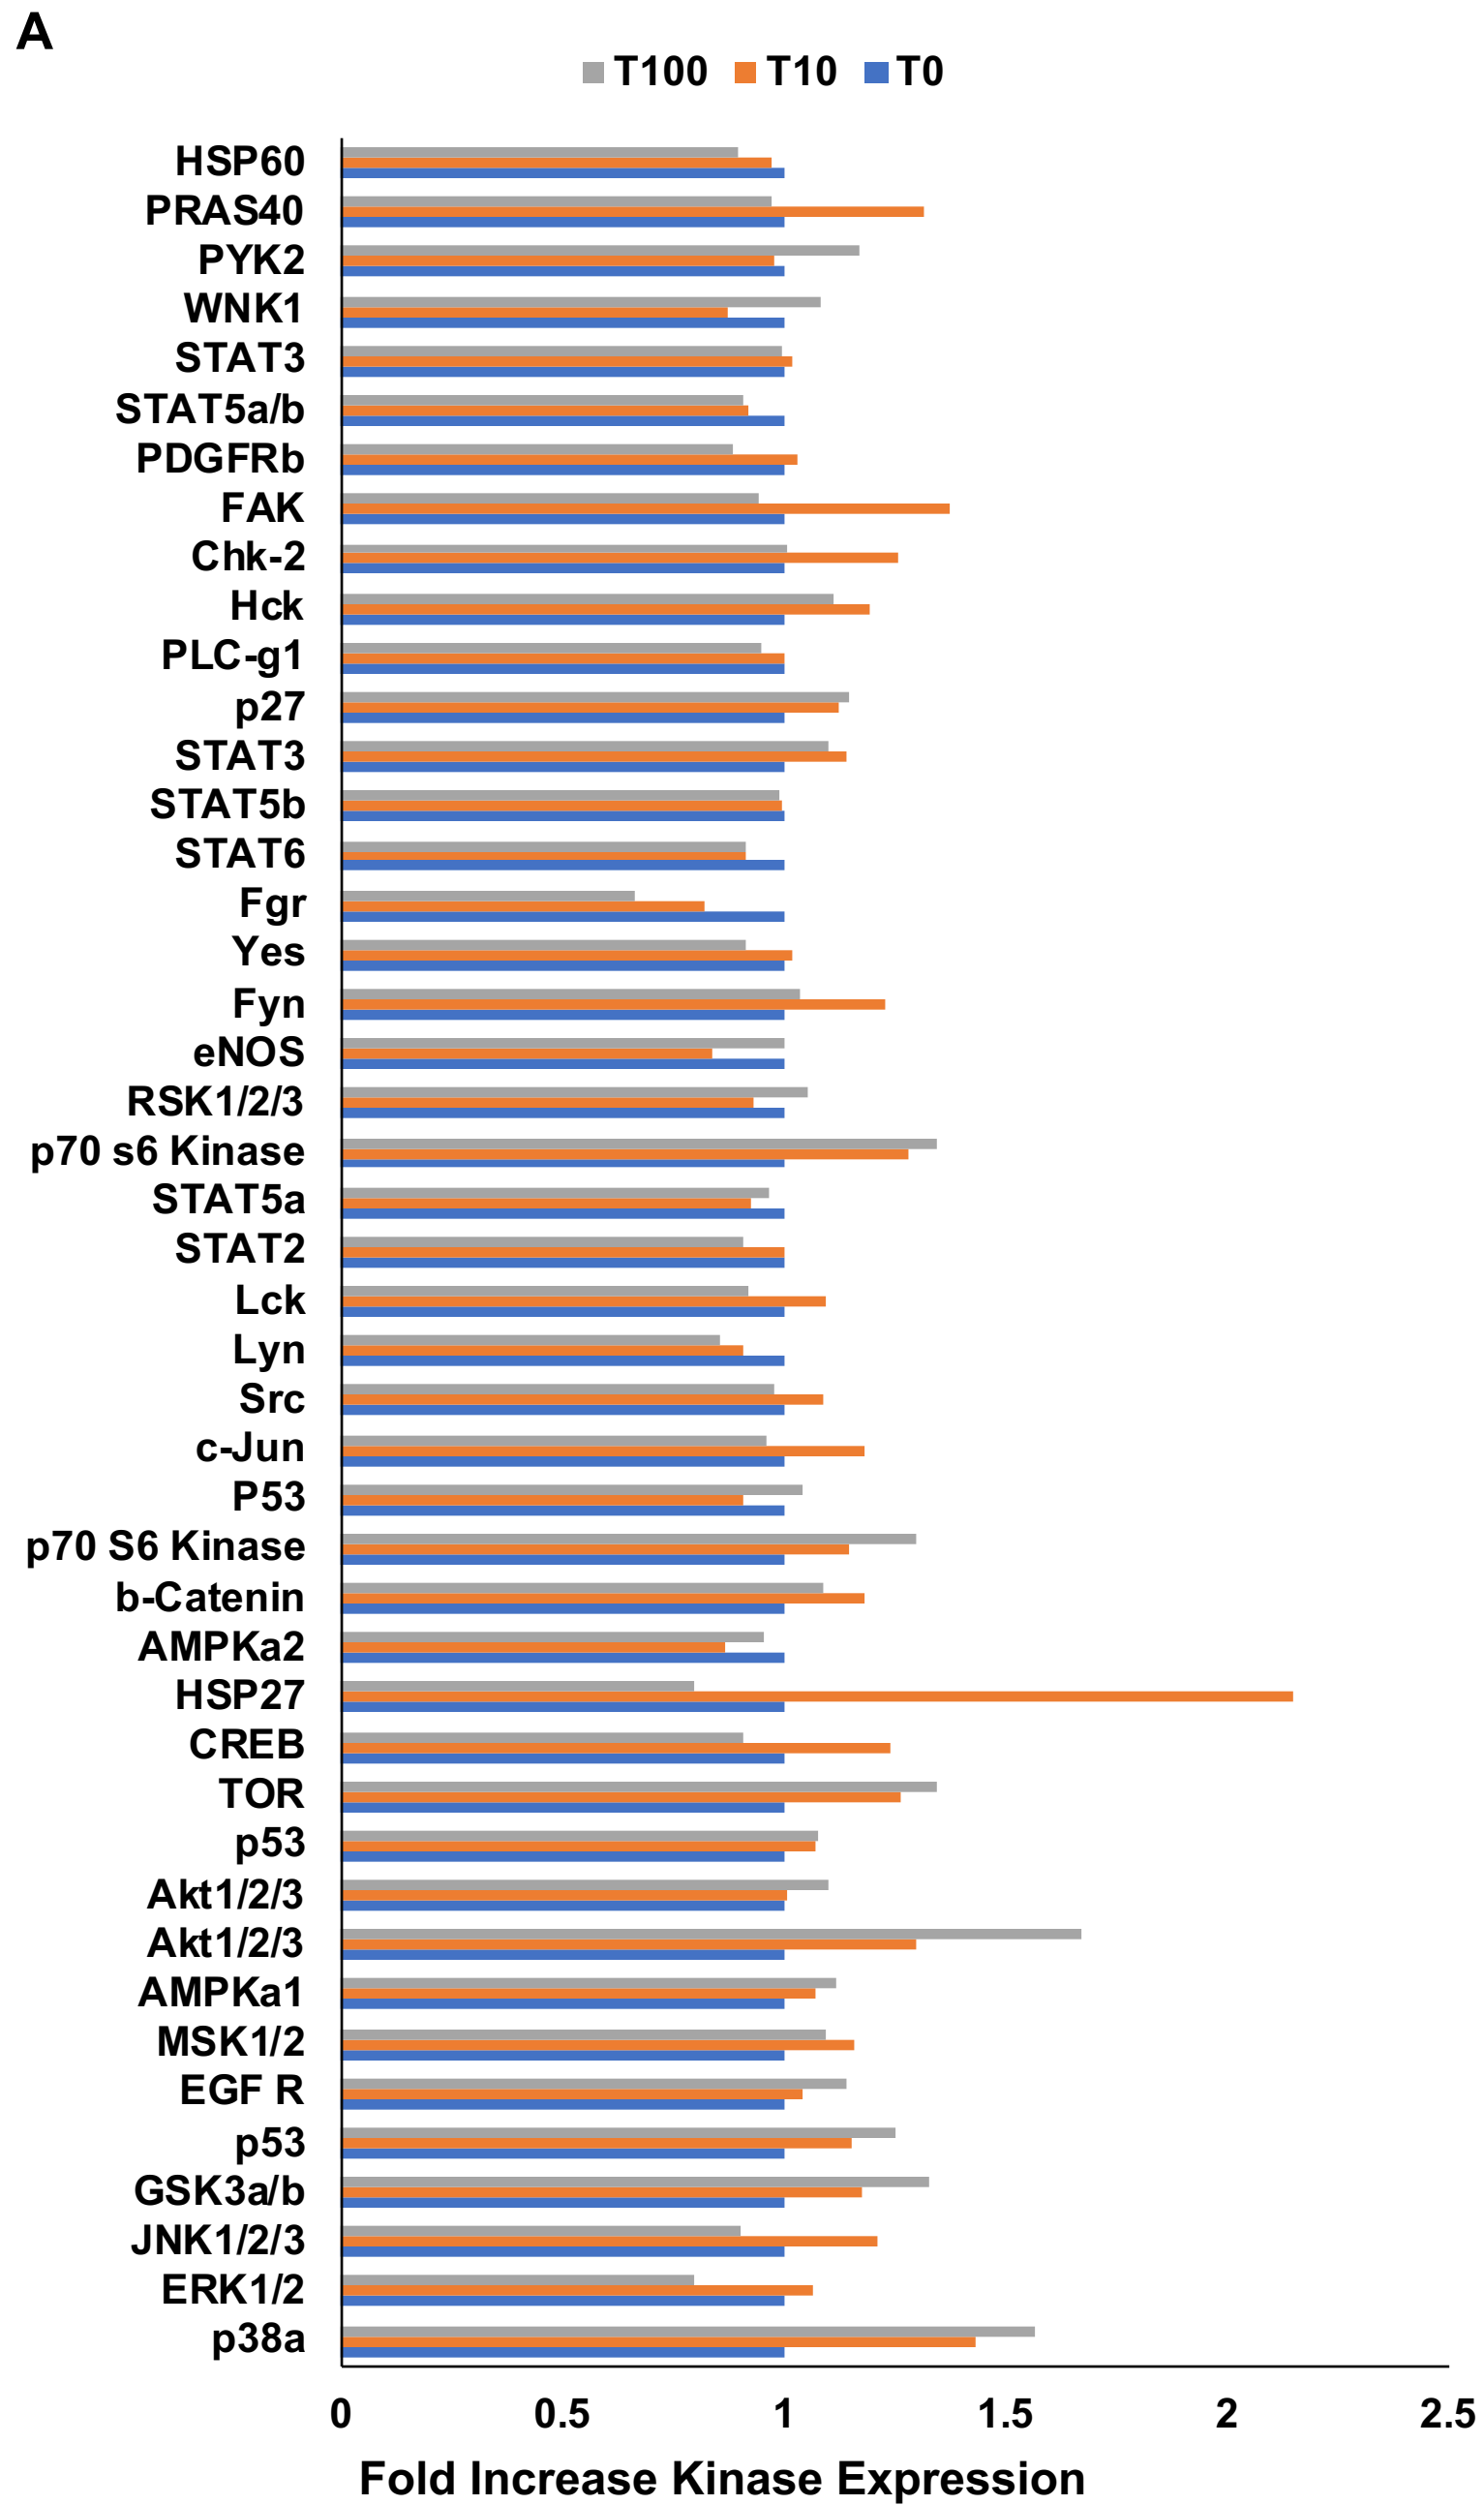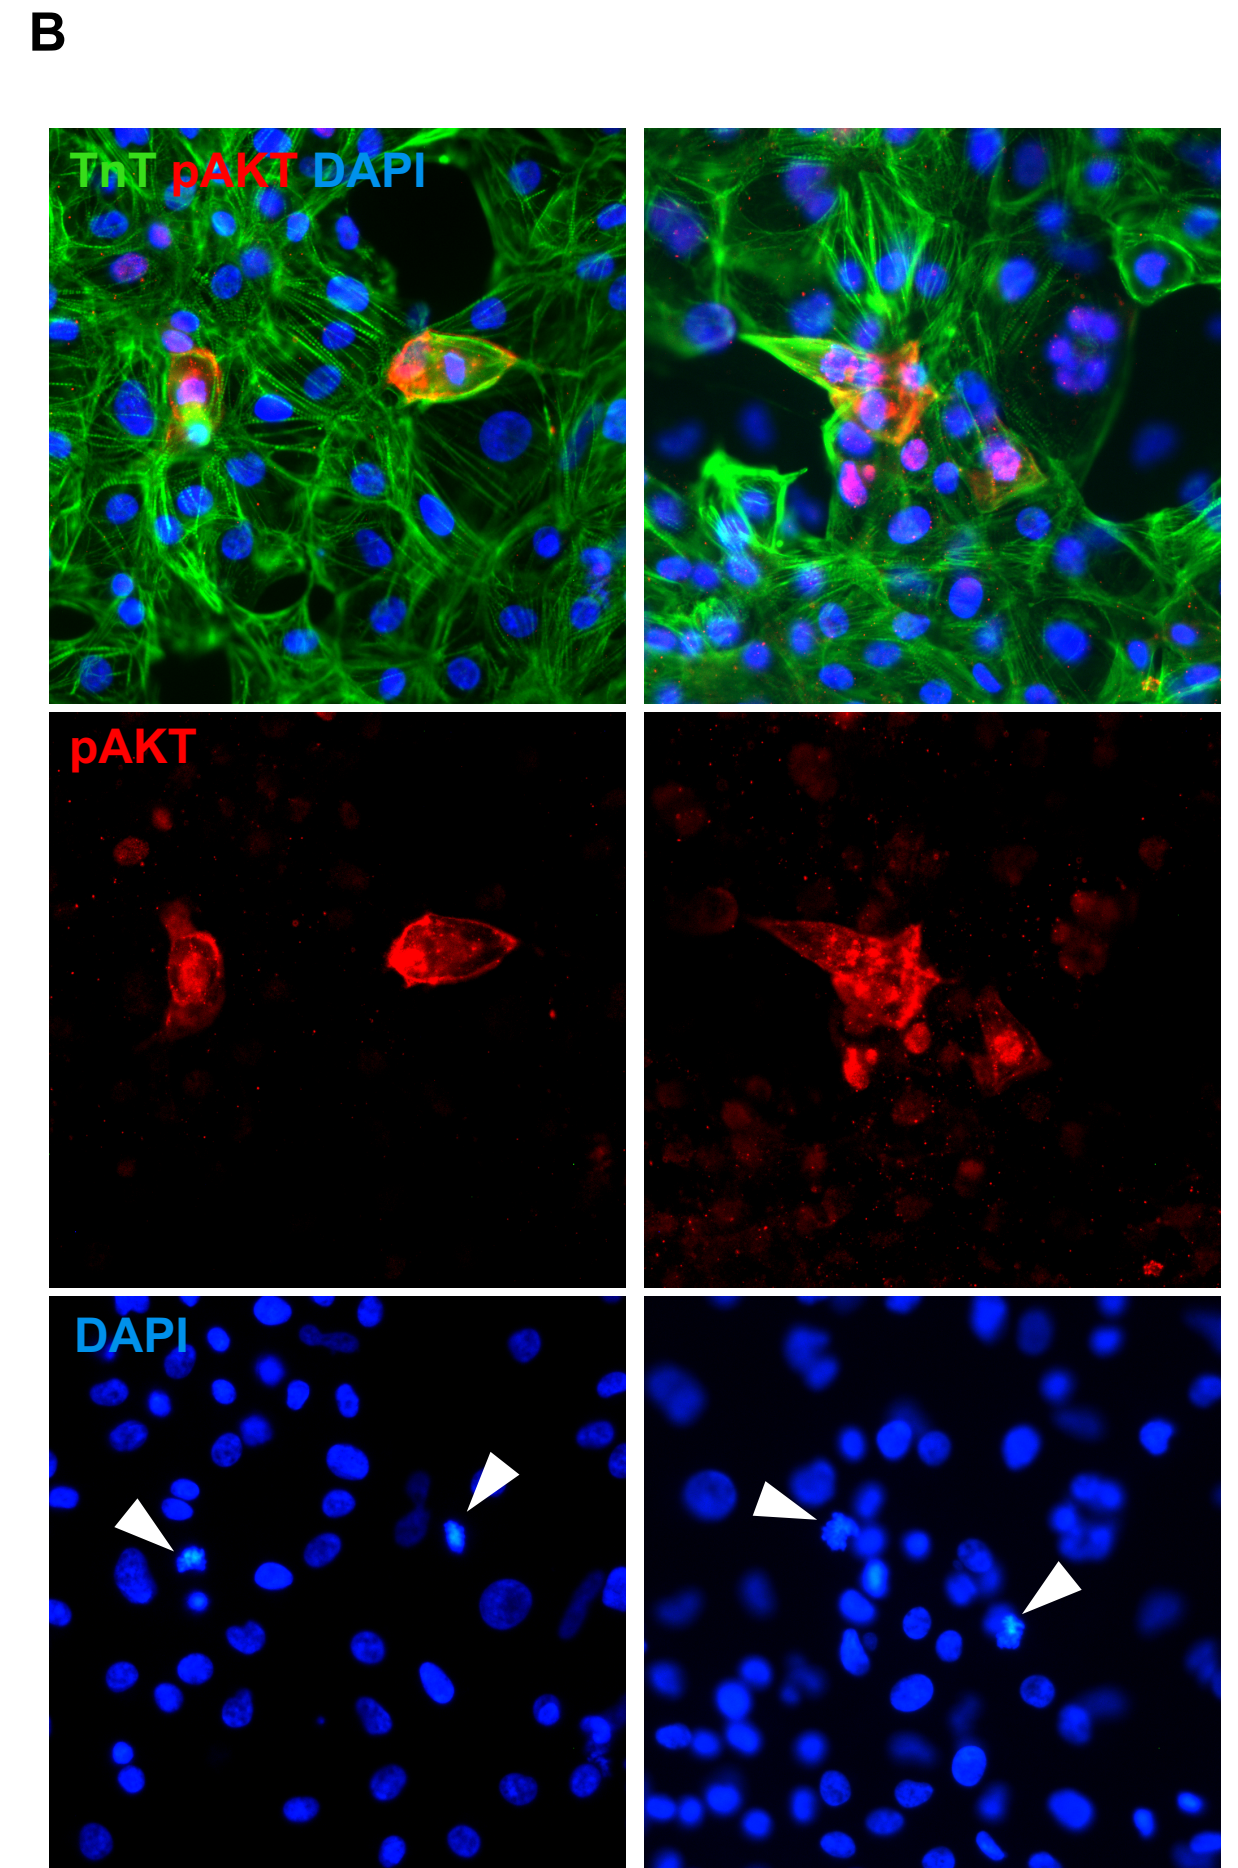

Supplement: NIHMS1602683-supplement-5.pdf [file NIHMS1602683-supplement-5.pdf]

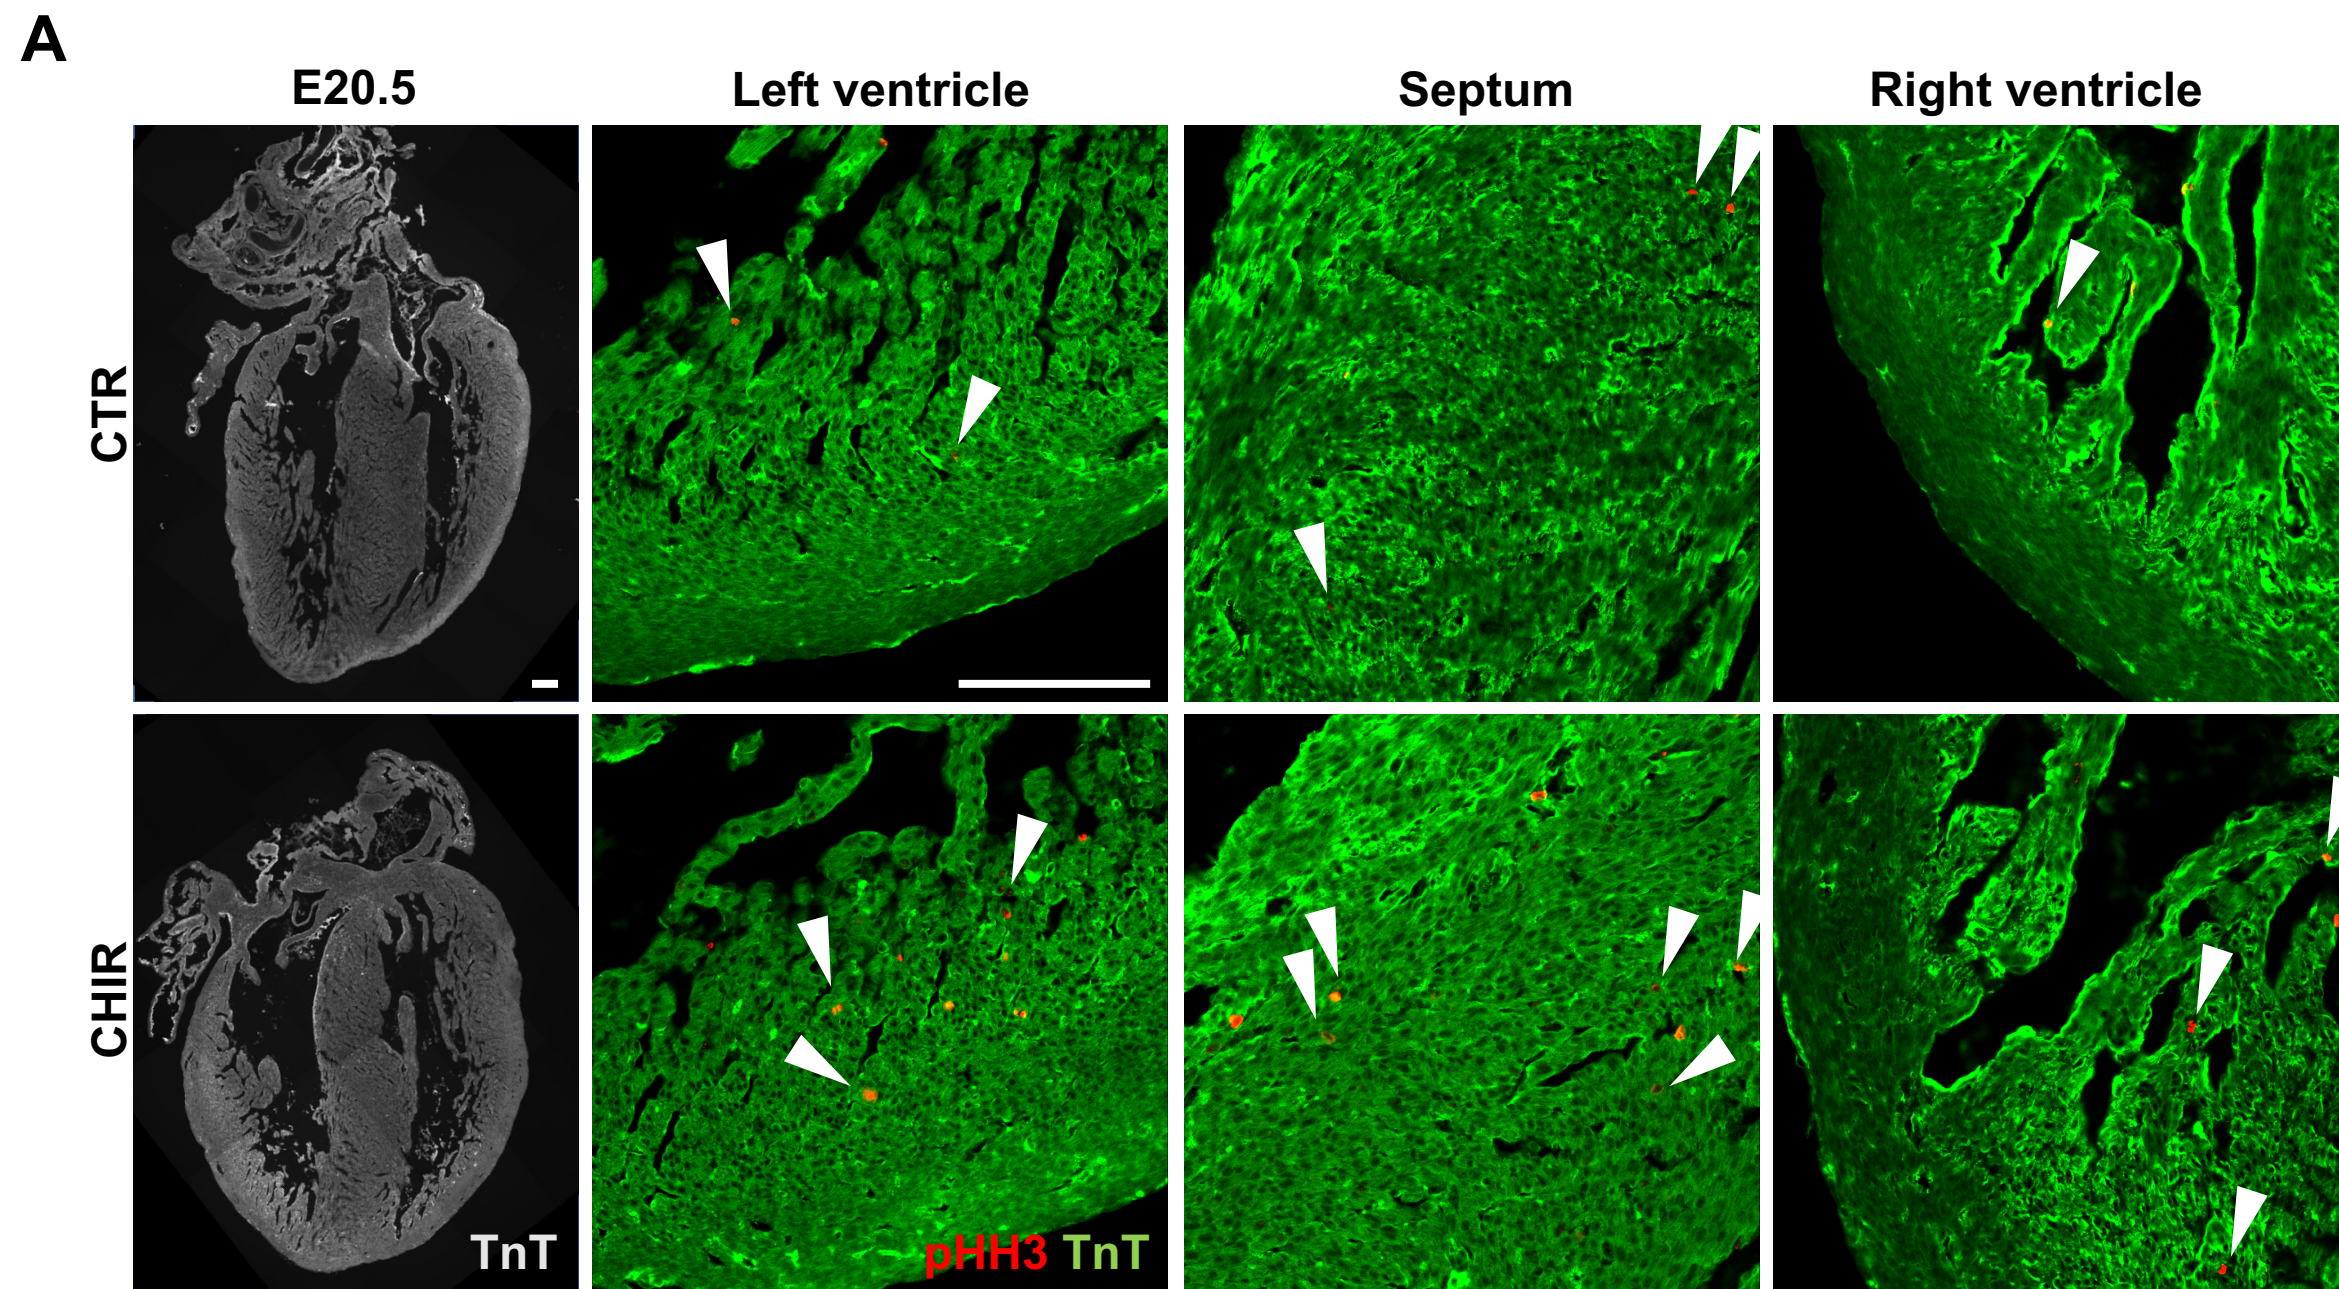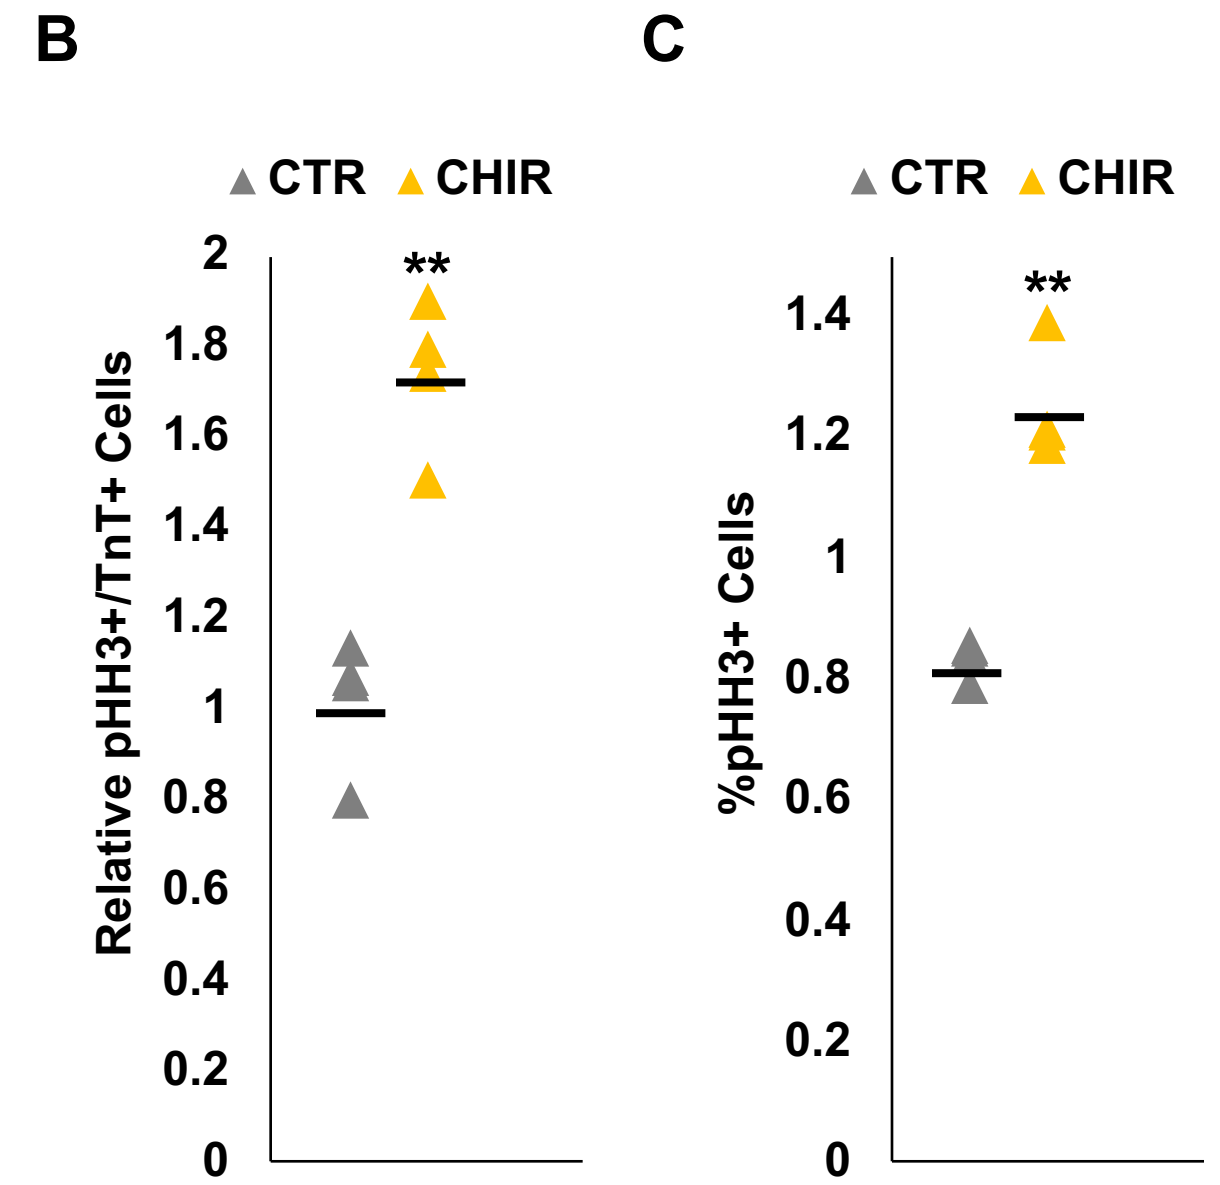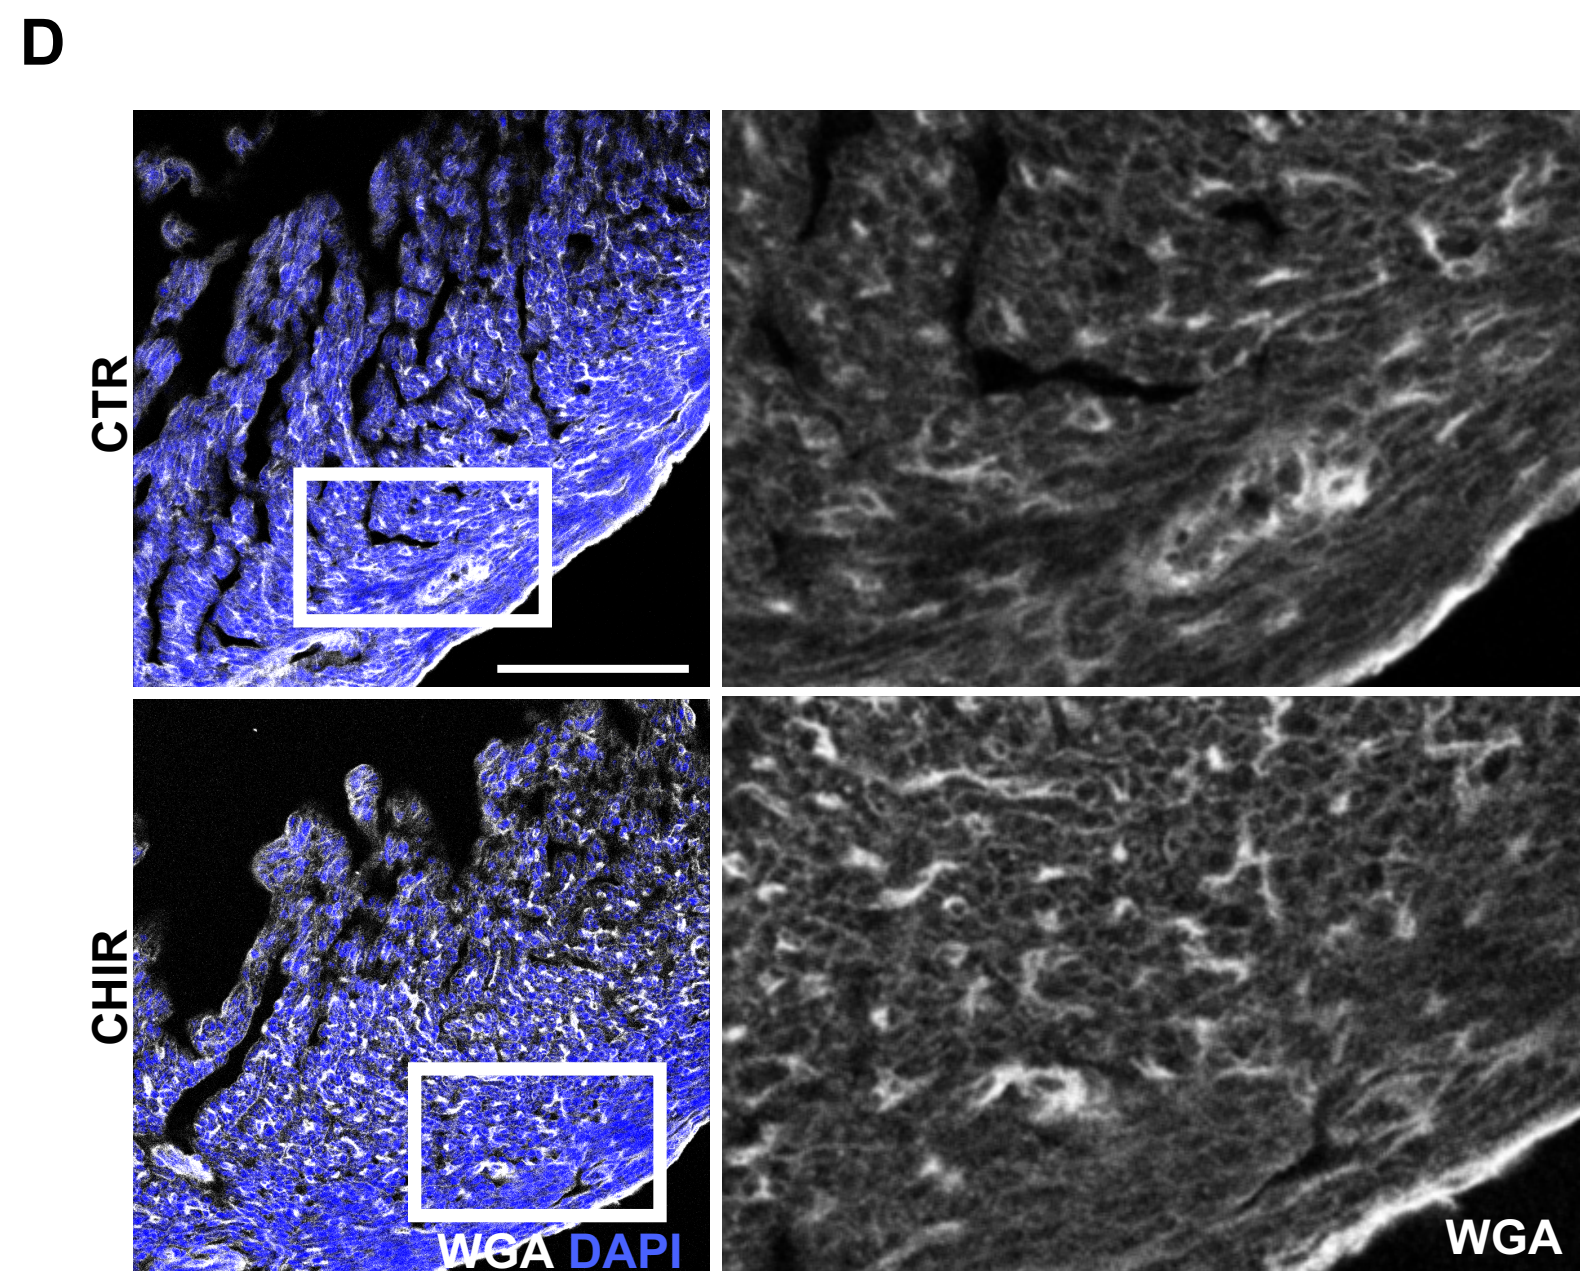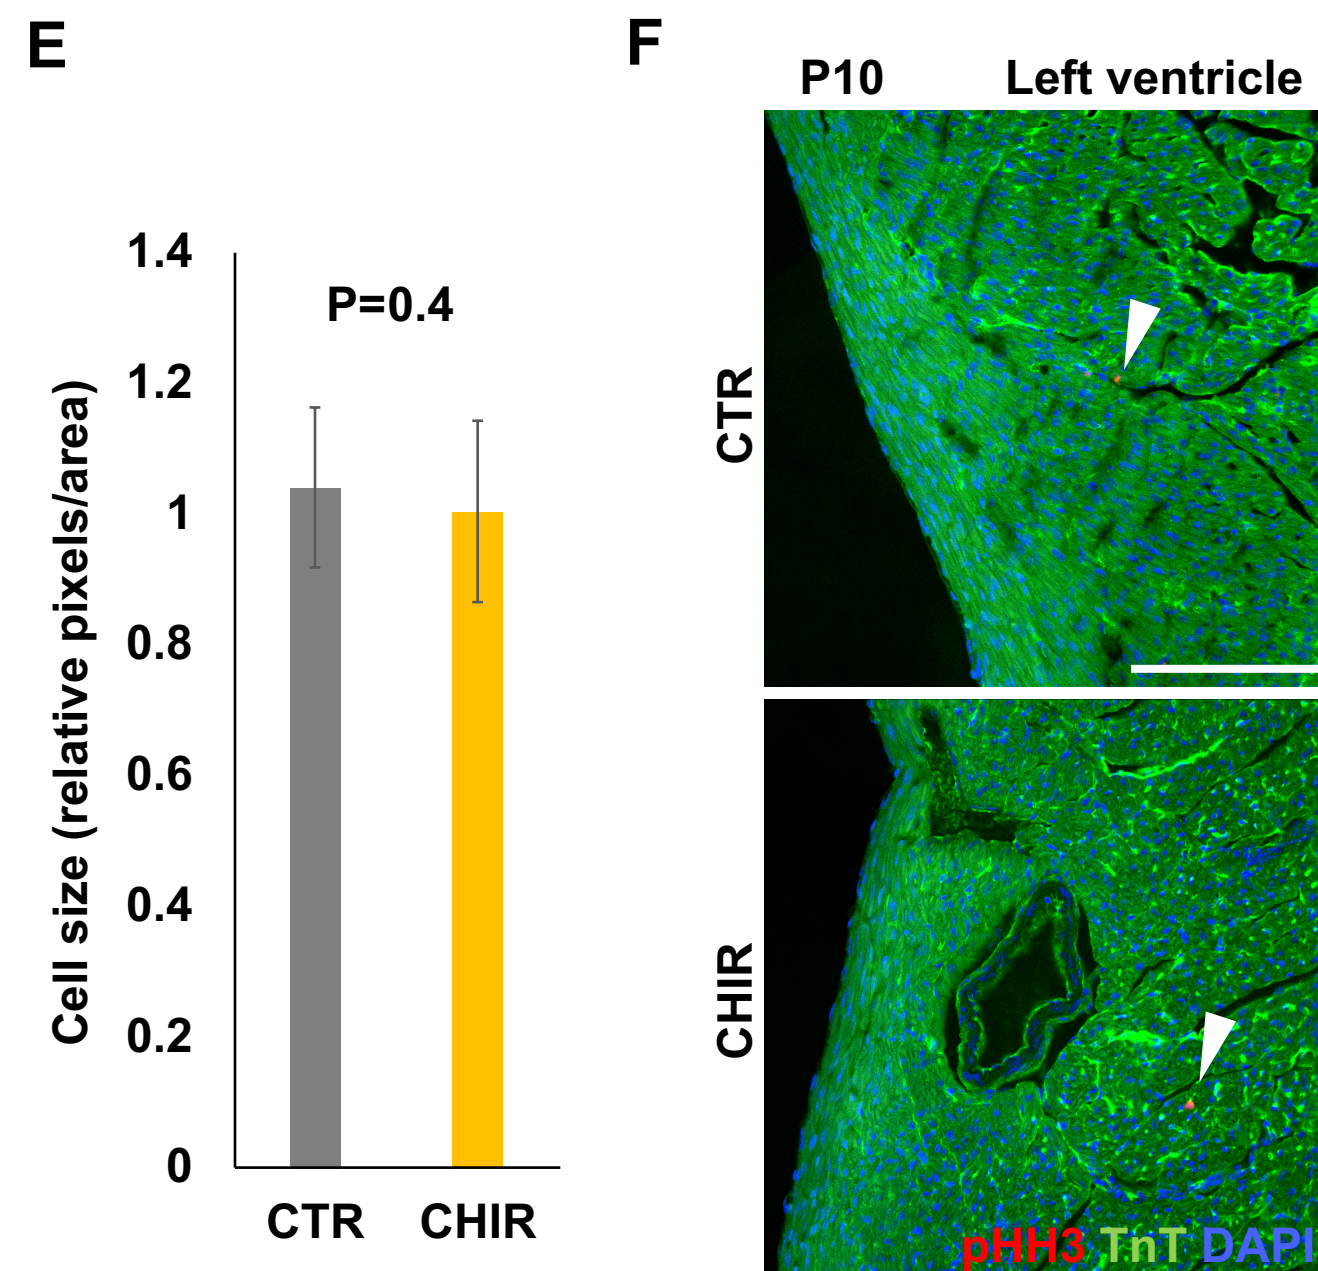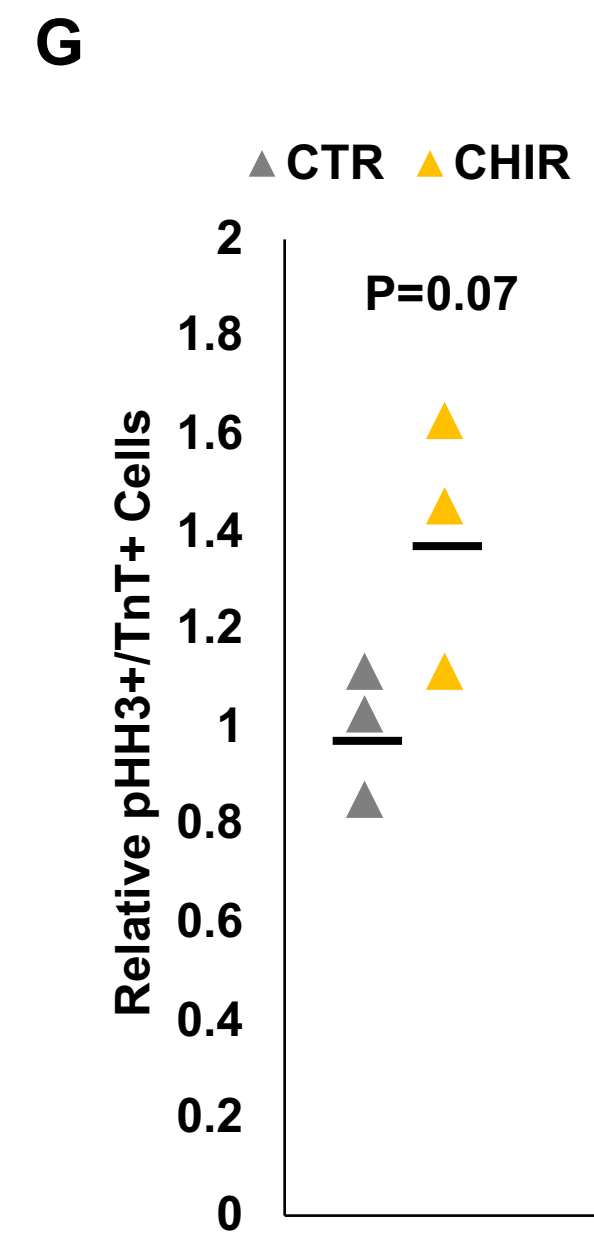

Supplement: NIHMS1602683-supplement-6.pdf [file NIHMS1602683-supplement-6.pdf]
